# Supplementary material for: Active surveillance of 2017 seasonal influenza vaccine safety: an observational cohort study of individuals aged 6 months and older in Australia
Source: PubMed Central journal article supplement — BMJ Open. 2018 Oct 18;8(10):e023263. doi: 10.1136/bmjopen-2018-023263 (PMC6196842; doi:10.1136/bmjopen-2018-023263), 2018-10-18
Supplement: bmjopen-2018-023263.draft_revisions.pdf [file bmjopen-2018-023263.draft_revisions.pdf]

# BMJ Open

BMJ Open is committed to open peer review. As part of this commitment we make the peer review history of every article we publish publicly available.

When an article is published we post the peer reviewers' comments and the authors' responses online. We also post the versions of the paper that were used during peer review. These are the versions that the peer review comments apply to.

The versions of the paper that follow are the versions that were submitted during the peer review process. They are not the versions of record or the final published versions. They should not be cited or distributed as the published version of this manuscript.

BMJ Open is an open access journal and the full, final, typeset and author-corrected version of record of the manuscript is available on our site with no access controls, subscription charges or pay-per-view fees (<http://bmjopen.bmj.com>).

If you have any questions on BMJ Open's open peer review process please email [info.bmjopen@bmj.com](mailto:info.bmjopen@bmj.com)

# BMJ Open

## Active surveillance of 2017 seasonal influenza vaccine safety in individuals aged 6 months and older in Australia

|                               |                                                                                                                                                                                                                                                                                                                                                                                                                                                                                                                                                                                                                                                                                                                                                                                                                                                                                                                                                                                                                                                                                                                                                                                                                                                                                                                                                                                                             |
|-------------------------------|-------------------------------------------------------------------------------------------------------------------------------------------------------------------------------------------------------------------------------------------------------------------------------------------------------------------------------------------------------------------------------------------------------------------------------------------------------------------------------------------------------------------------------------------------------------------------------------------------------------------------------------------------------------------------------------------------------------------------------------------------------------------------------------------------------------------------------------------------------------------------------------------------------------------------------------------------------------------------------------------------------------------------------------------------------------------------------------------------------------------------------------------------------------------------------------------------------------------------------------------------------------------------------------------------------------------------------------------------------------------------------------------------------------|
| Journal:                      | <i>BMJ Open</i>                                                                                                                                                                                                                                                                                                                                                                                                                                                                                                                                                                                                                                                                                                                                                                                                                                                                                                                                                                                                                                                                                                                                                                                                                                                                                                                                                                                             |
| Manuscript ID                 | bmjopen-2018-023263                                                                                                                                                                                                                                                                                                                                                                                                                                                                                                                                                                                                                                                                                                                                                                                                                                                                                                                                                                                                                                                                                                                                                                                                                                                                                                                                                                                         |
| Article Type:                 | Research                                                                                                                                                                                                                                                                                                                                                                                                                                                                                                                                                                                                                                                                                                                                                                                                                                                                                                                                                                                                                                                                                                                                                                                                                                                                                                                                                                                                    |
| Date Submitted by the Author: | 29-Mar-2018                                                                                                                                                                                                                                                                                                                                                                                                                                                                                                                                                                                                                                                                                                                                                                                                                                                                                                                                                                                                                                                                                                                                                                                                                                                                                                                                                                                                 |
| Complete List of Authors:     | <p>Pillsbury, Alexis; National Centre for Immunisation Research and Surveillance, The Children's Hospital at Westmead<br/> Glover, Catherine; National Centre for Immunisation Research and Surveillance, The Children's Hospital at Westmead<br/> Jacoby, Peter; Telethon Kids Institute, Wesfarmers Centre of Vaccines and Infectious Diseases<br/> Quinn, Helen; National Centre for Immunisation Research and Surveillance, The Children's Hospital at Westmead; The University of Sydney, Discipline of Paediatrics and Child Health<br/> Fathima, Parveen; Telethon Kids Institute, Wesfarmers Centre of Vaccines and Infectious Diseases<br/> Cashman, PM; Hunter New England Population Health, Newcastle, New South Wales<br/> Leeb, Alan; SmartVax, c/o Illawarra Medical Centre; Illawarra Medical Centre<br/> Blyth, Christopher C.; Telethon Kids Institute, Wesfarmers Centre of Vaccines and Infectious Diseases; University of Western Australia, School of Medicine<br/> Gold, Michael ; University of Adelaide, Discipline of Paediatrics<br/> Snelling, Tom; Princess Margaret Hospital for Children; Telethon Kids Institute, Wesfarmers Centre of Vaccines and Infectious Diseases<br/> Macartney, Kristine; National Centre for Immunisation Research and Surveillance, The Children's Hospital at Westmead; The University of Sydney, Discipline of Paediatrics and Child Health</p> |
| Keywords:                     | Epidemiology < INFECTIOUS DISEASES, vaccine safety, active surveillance                                                                                                                                                                                                                                                                                                                                                                                                                                                                                                                                                                                                                                                                                                                                                                                                                                                                                                                                                                                                                                                                                                                                                                                                                                                                                                                                     |
|                               |                                                                                                                                                                                                                                                                                                                                                                                                                                                                                                                                                                                                                                                                                                                                                                                                                                                                                                                                                                                                                                                                                                                                                                                                                                                                                                                                                                                                             |

SCHOLARONE™  
Manuscripts

**TITLE**

Active surveillance of 2017 seasonal influenza vaccine safety in individuals aged 6 months and older  
in Australia

**AUTHORS**

Alexis J Pillsbury, MPhil App Epi<sup>a</sup>

Catherine Glover, MS<sup>a</sup>

Peter Jacoby, MSc<sup>b</sup>

Helen E Quinn, PhD<sup>a,c</sup>

Parveen Fathima, MID<sup>b</sup>

Patrick Cashman, MPHTM<sup>d</sup>

Alan Leeb, FRACGP<sup>e,f</sup>

Christopher C Blyth, PhD<sup>b,g,h,i</sup>

Michael S Gold, MD<sup>j</sup>

Thomas Snelling, PhD<sup>b,h,k,l</sup>

Kristine K Macartney, MD<sup>a,c,m</sup>

**AFFILIATIONS**

<sup>a</sup>National Centre for Immunisation Research and Surveillance, The Children's Hospital at Westmead,  
New South Wales, Australia

<sup>b</sup>Wesfarmers Centre of Vaccines and Infectious Diseases, Telethon Kids Institute, Perth, Western  
Australia, Australia

1  
2  
3 <sup>c</sup>Discipline of Paediatrics and Child Health, University of Sydney, New South Wales, Australia  
4

5 <sup>d</sup>Hunter New England Population Health, Newcastle, New South Wales, Australia  
6  
7

8 <sup>e</sup>SmartVax, c/o Illawarra Medical Centre, Ballajura, Western Australia, Australia  
9

10  
11 <sup>f</sup>Illawarra Medical Centre, Ballajura, Western Australia, Australia  
12  
13

14 <sup>g</sup>School of Medicine, University of Western Australia, Western Australia, Australia  
15

16  
17 <sup>h</sup>Princess Margaret Hospital for Children, Perth, Western Australia, Australia  
18  
19

20 <sup>i</sup>Department of Microbiology, PathWest Laboratory Medicine WA, QEII Medical Centre, Perth,  
21  
22 Western Australia, Australia  
23  
24

25 <sup>j</sup>School of Medicine, Discipline of Paediatrics, University of Adelaide, Adelaide, Australia  
26  
27

28 <sup>k</sup>Curtin University, School of Public Health, Perth, Western Australia, Australia  
29  
30

31 <sup>l</sup>Menzies School of Health Research and Charles Darwin University, Darwin, Northern Territory,  
32  
33 Australia  
34  
35

36 <sup>m</sup>Department of Microbiology and Infectious Disease, The Children's Hospital at Westmead, New  
37  
38 South Wales, Australia  
39  
40

#### 41 **CONTACT INFORMATION FOR CORRESPONDING AUTHOR** 42

43 Alexis Pillsbury  
44

45 National Centre for Immunisation Research and Surveillance  
46

47 Westmead, NSW 2145, Australia  
48

49 [alexis.pillsbury@health.nsw.gov.au](mailto:alexis.pillsbury@health.nsw.gov.au)  
50

51 61 2 9845 1497  
52  
53  
54  
55  
56  
57  
58  
59  
60

**EMAIL ADDRESSES OF OTHER AUTHORS**

Catherine Glover (Catherine.Glover1@health.nsw.gov.au)

Peter Jacoby (Peter.Jacoby@telethonkids.org.au)

Helen E Quinn (Helen.Quinn@health.nsw.gov.au)

Parveen Fathima (Parveen.Fathima@telethongkids.org.au)

Patrick Cashman (Patrick.Cashman@hnehealth.nsw.gov.au)

Alan Leeb (alan@illawarramedical.com.au)

Christopher C Blyth (Christopher.Blyth@uwa.edu.au)

Michael S Gold (Michael.Gold@adelaide.edu.au)

Thomas Snelling (Tom.Snelling@telethonkids.org.au)

Kristine Macartney (Kristine.Macartney@health.nsw.gov.au)

**WORD COUNT**

**3001**

**KEY WORDS**

Infectious disease epidemiology; vaccine safety; active surveillance

## ABSTRACT

**Objective:** To actively solicit adverse events experienced in the days following immunisation with quadrivalent inactivated influenza vaccine using Australia's near real-time, participant-based vaccine safety surveillance system, AusVaxSafety.

**Design and setting:** Observational cohort study conducted in 194 sentinel surveillance immunisation sites (primary care, hospital, and community-based clinics) across Australia.

**Participants:** Individuals aged  $\geq 6$  months who received a routine seasonal influenza vaccine at a participating site (N=102,911) and responded to a survey (via Short Message Service or email) sent 3 days post-vaccination about adverse events experienced (N =73,892; 71.8%).

**Main Outcome Measure:** Near real-time and cumulative participant-reported rates of any adverse event, fever or medical attendance experienced within 3 days post-vaccination overall, by brand, age, pregnancy status, and concomitant vaccine receipt.

**Results:** Participant median age was 57 years (range: 6 months–102 years); 58.1% (N=42,869) were female and 2.7% (N=2,018) were pregnant. Near real-time fast initial response cumulative summation and Bayesian analyses of weekly event rates did not demonstrate a safety signal. Children aged 6 months–4 years had higher event rates (522/6,180; 8.4%) compared to older ages; participants aged  $\geq 65$  years reported fewer events (1,695/28,154; 6.0%). There were no clinically significant differences in safety between brands, by age group or overall. Cumulative data analysis demonstrated that concomitant vaccination was associated with increased rates of fever (2.1% versus 0.8%) and medical attendance (0.8% versus 0.4%), although all rates were low and did not exceed expected levels.

**Conclusions:** Novel, post-marketing AusVaxSafety surveillance demonstrated comparable and expected safety outcomes for the 2017 quadrivalent inactivated influenza vaccines brands used in

1  
2  
3 Australia. These near real-time, participant-reported data are expected to encourage confidence in  
4  
5 vaccine safety and promote uptake.  
6  
7  
8  
9

## 10 **STRENGTHS AND LIMITATIONS OF THIS STUDY**

- 13 • A large number of vaccinated individuals of all ages across Australia participated, leading to  
14 a greater ability to detect serious adverse events.  
15
- 16 • Comprehensive data enabled analysis of adverse events with respect to age, pregnancy,  
17 vaccine brand, and concomitant vaccination with a wide variety of vaccines.  
18
- 19 • Safety signal detection was conducted in near real time using multiple statistical methods,  
20 with results reported to the public each week.  
21
- 22 • Individuals participating in active surveillance may be less inclined to report common and  
23 expected reactions, limiting the ability to compare reported adverse event rates with those  
24 from clinical trials.  
25
- 26 • Some outcomes of vaccine safety, such as participant-reported fever, are subjective and  
27 have not been verified.  
28  
29  
30  
31  
32  
33  
34  
35  
36  
37  
38  
39

## 40 **FUNDING**

41  
42 AusVaxSafety surveillance was funded under a contract with the Australian Government Department  
43 of Health.  
44  
45  
46

## 47 **COMPETING INTERESTS**

48  
49 All authors are either located at organisations that hold the AusVaxSafety contract from the  
50 Australian Government Department of Health or are subcontract holders. None of the authors has  
51 any other conflicts of interest to declare.  
52  
53  
54  
55  
56  
57  
58  
59  
60

## INTRODUCTION

Influenza vaccines are given to hundreds of millions of people within short, fixed periods of time worldwide each year.<sup>1</sup> This widespread use, coupled with the high degree of influenza vaccine variability, including multiple vaccine types (live, inactivated, subunit, or adjuvanted), manufacturing processes (in eggs, cell lines, or with recombinant techniques), and strain compositions (trivalent or quadrivalent, with the potential for vaccine viruses to change twice yearly across the Southern and Northern Hemisphere seasons), underscores the need for timely post-marketing vaccine safety surveillance. The European Medicines Agency (EMA) now requires manufacturers to address the paucity of clinical trial safety data available for vaccine changes by conducting enhanced post-marketing safety surveillance for seasonal influenza vaccines.<sup>2</sup>

AusVaxSafety, an automated, active vaccine safety surveillance system, reports near real-time, brand-specific data independently of manufacturers using participant-reported outcomes.

AusVaxSafety was established to improve vaccine safety monitoring following recommendations of an independent inquiry into the unprecedented increase in febrile seizures observed in young Australian children in 2010, ultimately determined to be associated with one influenza vaccine brand (Fluvax/Afluria; bioCSL).<sup>3</sup> This incident, which led to temporary nationwide suspension of paediatric influenza immunisation, resulted in a loss of confidence in influenza vaccines among consumers and immunisation providers and decreased influenza vaccine uptake.<sup>4 5</sup>

From 2014–2016 AusVaxSafety conducted influenza vaccine safety surveillance in 8,184 children aged 6 months–4 years.<sup>6 7</sup> A retrospective analysis comparing safety profiles of trivalent inactivated influenza vaccine (TIIV) and quadrivalent inactivated influenza vaccine (QIIV) brands in 2015 and 2016 demonstrated that concomitant vaccine administration in young children was associated with increased fever and medical attendance (MA) rates post-vaccination, although rates were low and within expected ranges.<sup>7</sup> Importantly, detailed follow-up data on the small number of children who



1  
2  
3 sought medical attention showed no serious or unexpected vaccine-associated adverse events  
4  
5 following immunisation (AEFI).  
6

7  
8 In 2017, AusVaxSafety surveillance expanded to include influenza vaccine recipients of all ages. Here  
9  
10 we provide an overview of AusVaxSafety's weekly surveillance and a detailed analysis of cumulative  
11  
12 (end of vaccine season) safety data by QIIV brand, age, pregnancy status and concomitant vaccine  
13  
14 receipt.  
15

## 16 17 **METHODS**

### 18 19 **AusVaxSafety active vaccine safety surveillance**

20  
21  
22 Surveillance included individuals aged  $\geq 6$  months who received a 2017 seasonal influenza vaccine  
23  
24 between 1 April–31 August 2017 at one of 194 participating immunisation providers across Australia,  
25  
26 including general practices, hospitals, community-based clinics and Aboriginal Medical Services.  
27

28  
29 Most individuals were enrolled using the opt-out, computer-based monitoring platform SmartVax,  
30  
31 which integrates with immunisation provider management software to issue automated surveys to  
32  
33 vaccine recipients or their caregivers via SMS, as previously described.<sup>8</sup> A minority of AusVaxSafety  
34  
35 sites (n=30) utilised one of two alternative computer-based monitoring platforms—Vaxtracker<sup>9</sup>  
36  
37 (recipients aged 6 months–4 years only) or STARSS (Stimulated Telephone-Assisted Rapid Safety  
38  
39 Surveillance)<sup>10</sup>—to solicit influenza vaccine adverse events following opt-in enrolment.  
40

41  
42 Vaccinated individuals/caregivers received an SMS from their medical provider 3 days post-  
43  
44 vaccination inquiring about AEFI (“We would like to know if there were any reactions to the vax.  
45  
46 Please reply with JUST a Y or N.”). Those who responded “Y” or “N” were classified as participants,  
47  
48 and those who responded “Y” were then asked whether or not the event was medically attended.  
49  
50 “Yes” responders were asked to detail the adverse event(s) and/or medical attention in a short  
51  
52 online survey, which listed a range of symptoms and asked participants to tick all symptoms  
53  
54 experienced. As children aged 6 months–8 years and immunocompromised individuals of any age  
55  
56  
57  
58  
59  
60

1  
2  
3 are recommended to receive two vaccine doses at least four weeks apart when first immunised,  
4  
5 some may have been represented by more than one record.  
6

7  
8 Primary outcomes surveyed were reports of any event (yes or no), fever (solicited in the online  
9  
10 survey), and MA (yes or no). Secondary outcomes (solicited in the online survey) were injection site  
11  
12 (IS) pain, swelling and/or redness; tiredness/fatigue; headache; sleep pattern change; irritability;  
13  
14 rash; vomiting; diarrhoea; rigors; non-responsiveness/loss-of-consciousness; and  
15  
16 convulsions/seizures. Unsolicited symptoms were detailed by participants in free text.  
17

18  
19 Detailed clinical data from MAs were sought using additional information from participants'  
20  
21 immunisation providers and/or by a public health authority, who attempted to contact  
22  
23 participants/caregivers.  
24

## 25 26 **Ethics**

27  
28 The AusVaxSafety surveillance system and its data monitoring platforms operate nationally under  
29  
30 human research ethical approval obtained from the Sydney Children's Hospital Network  
31  
32 (HREC/16/SCHN/19) and the Royal Australian College of General Practitioners National Research and  
33  
34 Evaluation Ethics Committee (NREEC15-007).  
35  
36

## 37 38 **Patient involvement**

39  
40 The AusVaxSafety surveillance system does not specifically recruit patients but does rely on  
41  
42 community participation. The AusVaxSafety surveillance system Advisory Committee includes a  
43  
44 consumer/patient representative. The data monitoring platforms were piloted and developed with  
45  
46 feedback from users. Surveillance results are uploaded to the AusVaxSafety website  
47  
48 ([www.ausvaxsafety.org.au](http://www.ausvaxsafety.org.au)) weekly and available to the public.  
49  
50

### **Near real-time reporting and analysis**

De-identified records (including demographic, immunisation visit, and SMS/survey response data) were uploaded to the computer-based monitoring systems and exported weekly to the AusVaxSafety coordinating centre for aggregation and analysis. MA reports triggered clinical follow-up by designated public health authorities each weekday. Weekly analysis of cumulative data (received up to 5 days prior) for age- and pregnancy-specific AEFI rates and participant demographic characteristics were reported in detail to the Australian Department of Health and summary results published online each Friday ([www.ausvaxsafety.org.au](http://www.ausvaxsafety.org.au)) from week three of surveillance for the duration of the surveillance period.

### **Weekly signal detection**

Participant-reported rates of fever (for those aged 6 months–4 years) and MA (for all participants, grouped by age: 6 months–4 years, 5–64 years, and ≥65 years; and pregnant participants) as a surrogate for serious adverse events (SAE)<sup>7</sup> were considered the most objective outcome measures of vaccine safety and were monitored weekly using signal detection methods.

Fast initial response cumulative summation (FIR CUSUM) control charts monitored log-likelihood ratios of each event rate being at a maximum acceptable level versus expected level.<sup>11</sup> Expected and maximum acceptable rates were set based on syntheses of clinical trial data and previous surveillance results.<sup>6 7 9 12-14</sup> The expected MA rate was set at 1%, and the expected fever rate at 3%. Maximum acceptable rates were set at 3% and 10% for MA and fever, respectively. A safety signal is generated if the log-likelihood ratio (a measure of the degree to which the data are more consistent with an event rate equal to the maximum acceptable rate versus the expected rate) rises above a predetermined threshold. The threshold log-likelihood ratio was selected such that across 10,000 simulated vaccination seasons there would be ≥80% probability of signal generation within 3 weeks

1  
2  
3 of commencement if the event rate is at the maximum acceptable level, and  $\leq 2\%$  probability of  
4  
5 (false) signal generation over the entire season when the event rate is at the expected level.  
6

7  
8 Bayesian analysis was also performed weekly for robust, optimal estimation of the 95% credibility  
9  
10 interval (CI) for true cumulative event rates. Beta distributions with means derived from 2016  
11  
12 surveillance data and literature review (MA: 1% for participants aged 6 months–4 years; 0.3% for  
13  
14 participants aged 5–64 years and  $\geq 65$  years; 1% for pregnant participants; and fever: 3% for  
15  
16 participants aged 6 months–4 years)<sup>7</sup> were used as priors at the start of the 2017 season. Priors  
17  
18 were updated with each week's observed data and credibility intervals from the posterior beta  
19  
20 distribution were reported weekly.  
21  
22

### 23 **End-of-surveillance cumulative analysis**

24  
25  
26 Cumulative data were reported by epidemiological week and demographic information including age  
27  
28 (6 months–4 years, 5–14 years, 15–39 years, 40–64 years, and  $\geq 65$  years), sex, pregnancy status  
29  
30 (available for SmartVax participants only), Aboriginal and/or Torres Strait Islander (hereafter  
31  
32 referred to as Indigenous) status, and concomitant vaccine administration (defined as any additional  
33  
34 vaccine(s) received at the same visit as influenza vaccine).  
35  
36

37  
38 For any adverse event, fever, and MA, rates were calculated for each age group and pairwise  
39  
40 proportion tests with Holm adjustment for multiple comparisons were performed to compare AEFI  
41  
42 rates between pairs of age groups using R version 3.4.2 (R Foundation for Statistical Computing,  
43  
44 Vienna, Austria). AEFI rates in pregnant women were compared to those of non-pregnant female  
45  
46 SmartVax participants of the same age range (15–49 years) using Pearson's chi-square test in Stata  
47  
48 version 14.2 (Statacorp LLC, College Station, TX, USA). Rates of primary and secondary outcomes  
49  
50 were calculated by brand, and secondary outcomes were calculated for each age group and  
51  
52 pregnant women.  
53  
54  
55  
56  
57  
58  
59  
60

1  
2  
3 Primary outcome AEFI rates were also calculated for age groups and pregnant women by vaccine  
4 brand and concomitant vaccine receipt (yes or no). The relative risk of each adverse event was  
5 compared for those receiving influenza vaccine plus any concomitant vaccine(s) versus influenza  
6 vaccine alone, and for those receiving FluQuadri versus Fluarix Tetra, using a generalised linear model  
7 with a log link and binomial distribution in Stata version 14.2.  
8  
9  
10  
11  
12

## 13 14 **RESULTS**

### 15 16 17 **Weekly signal detection throughout 2017**

18 No safety signals were detected by the FIR CUSUM method (eFigure 1). Weekly and cumulative  
19 Bayesian rates of fever and MA remained well below their respective maximum acceptable rates  
20 over the surveillance period: the cumulative (end-of-season) fever rate in children aged 6 months–4  
21 years was 2.3% (95% posterior CI: 2.0, 2.7), while cumulative MA rates were 1.0% (95% CI: 0.73,  
22 1.21) in children aged 6 months–4 years, 0.5% (95% CI: 0.41, 0.55) in participants aged 5–64 years,  
23 0.3% (95% CI: 0.22, 0.34) in participants aged ≥65 years and 0.5% (95% CI: 0.26, 0.87) in pregnant  
24 women.  
25  
26  
27  
28  
29  
30  
31  
32  
33

### 34 35 **End-of-surveillance analysis**

36 Over the surveillance period, 73,892 of 102,911 enrollees (71.8%) responded to the post-vaccination  
37 SMS. Participants received one of four available QIIVs: Fluarix Tetra (GlaxoSmithKline; 45.3%),  
38 FluQuadri (Sanofi-Aventis; 42.3%), FluQuadri Junior (Sanofi-Aventis; 5.6%), or Afluria Quad (Seqirus;  
39 6.8%); less than 1.0% received a vaccine whose brand could not be determined. Half of all vaccines  
40 were administered within 5 weeks of starting surveillance, with older participants (≥65 years)  
41 receiving vaccines earlier compared to young children (6 months–4 years old) and pregnant women  
42 (Figure 1).  
43  
44  
45  
46  
47  
48  
49  
50  
51

52 Among all participants, 58.1% were female and the median age was 57 years (range: 6 months–102  
53 years). Two percent (1,156/58,145 with data available) were Indigenous, which is representative of  
54  
55  
56  
57  
58  
59  
60

1  
2  
3 the Australian national Aboriginal and/or Torres Strait Islander population (2.8%) (Table 1). Among  
4 female participants aged 15–49 years for whom pregnancy status was available (98.6%), 15.2%  
5 (2,018/13,242) were pregnant. Individuals aged  $\geq 65$  years represented the largest proportion of  
6 participants (38.1%; 33.6% aged 65–79 years and 4.5% aged  $\geq 80$  years). Approximately 14% of  
7 participants (10,428/73,892) received a concomitant vaccine, of which 86.6% received only one. The  
8 most commonly received concomitant vaccines are listed in Table 1.

9  
10  
11 Compared to other age groups, children aged 6 months–4 years were reported as having  
12 significantly higher rates of any adverse event, while participants aged  $\geq 65$  years reported events  
13 less often (Table 2). Pregnant women reported significantly lower rates of any adverse event  
14 compared to non-pregnant women of the same age range (15–49 years;  $p=.019$ , data not shown).  
15 Rates of more subjective secondary outcomes surveyed showed similar trends across age groups and  
16 by pregnancy status (eTable 1).

17  
18  
19 Participants who received concomitant vaccine(s) had an elevated risk of reporting any adverse  
20 event and fever compared to participants who received influenza vaccine alone (Table 3). This  
21 pattern was seen for all age groups, with the exception of fever in participants aged 15–39 years and  
22 pregnant women. Participants aged  $\geq 40$  years who received concomitant vaccine(s) reported MA at  
23 a significantly higher rate than those who received only an influenza vaccine.

24  
25  
26 Brand-specific AEFI rates were similar, particularly for FluQuadri and Fluarix Tetra, the brands  
27 administered to the majority of participants (Table 4, eTable 2).

## 28 29 30 **DISCUSSION**

31  
32 AusVaxSafety surveillance utilised almost 74,000 actively solicited participant-reported outcomes to  
33 demonstrate that the four brands of QIV used in Australia in 2017 were safe and had low and  
34 comparable adverse event rates within expected ranges for all age groups and pregnant women.<sup>9 12-</sup>  
35  
36  
37  
38  
39  
40  
41  
42  
43  
44  
45  
46  
47  
48  
49  
50  
51  
52  
53  
54  
55  
56  
57  
58  
59  
60

1  
2  
3 <sup>14</sup> This novel system provided reassuring, locally-derived feedback on vaccine safety in near real time  
4  
5 to the public and immunisation providers as influenza vaccination was rolled out across Australia.<sup>15</sup>  
6

7  
8 Consistent with data published from vaccine clinical trials, the most common participant-reported  
9  
10 event following influenza immunisation was IS pain (1.7% overall). IS pain was also commonly  
11  
12 reported in clinical trials, but at higher rates than those demonstrated in this post-marketing  
13  
14 surveillance. Clinical trials in children reported IS pain in approximately two-thirds of those aged 3–  
15  
16 17 years<sup>16</sup> with similarly high rates (up to 72.4%) in adults aged 18–60 years.<sup>17,18</sup> This difference is  
17  
18 likely due to more active solicitation of AEFI in clinical trials via daily diary cards, resulting in more  
19  
20 complete reporting. Also, as AusVaxSafety participants may be informed of expected common  
21  
22 vaccine reactions by their clinicians, these symptoms may be less likely to be reported. By  
23  
24 comparison, data from both this post-marketing surveillance and clinical trials confirmed low rates  
25  
26 of SAEs (0.4% for AusVaxSafety compared with 0.0–2.3% for the clinical trials), despite differences in  
27  
28 SAE definitions. Equally reassuring, both IS pain rates and SAEs among pregnant women in our  
29  
30 surveillance were low and consistent with rates reported among participants of all ages.  
31  
32

33  
34 Adverse event rates were similar for Fluarix Tetra (GlaxoSmithKline) and FluQuadri (Sanofi-Aventis),  
35  
36 the two most utilised QIIVs in Australia in 2017. Though small and variable differences in AEFI rates  
37  
38 between brands were reported, this is likely attributable to factors such as age and uncontrolled  
39  
40 confounding, and is not of clinical significance. Ongoing brand-specific surveillance will provide  
41  
42 valuable safety data in future years, especially as two new, more immunogenic vaccine types—the  
43  
44 high dose TIIV (Fluzone High Dose, Sanofi-Aventis) and the MF-59 adjuvanted influenza vaccine  
45  
46 (Fluad, Seqirus)—are being included on the Australian National Immunisation Program (NIP) for  
47  
48 adults aged ≥65 years from 2018.<sup>19</sup>  
49

50  
51 We previously observed that AusVaxSafety participants aged 6 months–4 years who received  
52  
53 influenza vaccine and another vaccine concomitantly (in particular diphtheria-tetanus-acellular  
54  
55 pertussis-inactivated poliovirus (DTPa-IPV) or meningococcal B vaccines) had significantly increased  
56  
57

1  
2  
3 AEFI rates (especially fever) compared to those receiving influenza vaccine alone.<sup>6,7</sup> The present  
4  
5 analysis showed that AEFI were more common with concomitant vaccination among participants of  
6  
7 all ages, including increased fever rates in both children and older adults and an increased risk of MA  
8  
9 among those aged  $\geq 40$  years. The most commonly received concomitant vaccines were 23-valent  
10  
11 pneumococcal vaccine, reduced antigen pertussis-containing vaccine (dTpa) and live attenuated  
12  
13 zoster vaccine, which are reactogenic when administered individually.<sup>20-26</sup> It has been shown that  
14  
15 concomitant receipt of influenza and 13-valent pneumococcal vaccines results in increased local and  
16  
17 systemic events, including fever among children<sup>27-29</sup>, while such differences in AEFI rates were not  
18  
19 observed with concomitant receipt of influenza and pertussis or zoster vaccines.<sup>30-33</sup> Importantly, the  
20  
21 increased risks of AEFI occurring with concomitant vaccination reported by AusVaxSafety—including  
22  
23 those requiring MA—were low and likely not of clinical importance. This information may help  
24  
25 providers to reassure patients who are receiving more than one vaccine at the same time that  
26  
27 although they may have a slightly higher rate of side effects, the absolute rate is low overall. As  
28  
29 more vaccines become available, assessment of adverse events associated with concomitant  
30  
31 vaccination using surveillance like AusVaxSafety has the potential to contribute valuable detail to  
32  
33 post-marketing pharmacovigilance.  
34  
35

36  
37 To the best of our knowledge, AusVaxSafety is a unique post-marketing vaccine safety surveillance  
38  
39 system in its high level of automation, patient and provider engagement and ability to provide data  
40  
41 on vaccine brand-specific AEFI rates in near real time. However, since the EMA recommendation to  
42  
43 provide annual brand-specific safety data, there has been an increase in pilot and feasibility studies  
44  
45 of influenza vaccine safety surveillance methods and systems.<sup>34-38</sup> Several are enhanced passive  
46  
47 surveillance systems relying on patients returning adverse events reports via cards or telephone.<sup>34,36</sup>  
48  
49 Such systems are limited by potential under-reporting of events and are likely slower and more  
50  
51 resource-intensive as staff must enter AEFI details or conduct interviews. The Canadian National  
52  
53 Vaccine Safety (CANVAS) Network has conducted a small pilot of a mobile phone app for reporting  
54  
55 adverse events.<sup>38</sup> Eighty-six percent of those replying to questions about the usability of an app for  
56  
57  
58  
59



1  
2  
3 reporting AEFI said they would prefer an app to visiting a website. Nevertheless, investigators  
4  
5 acknowledged that the app was limited by download requirements and low survey completion rates.  
6  
7 The Centers for Disease Control and Prevention's Vaccine Safety Datalink, which utilises large linked  
8  
9 databases from health care organisations, conducts Rapid Cycle Analysis to report AEFI rates in near  
10  
11 real time but may be limited by delays between AEFI occurrence and electronic reporting to  
12  
13 administrative datasets.<sup>39 40</sup> AusVaxSafety surveys vaccine recipients directly and can thus quickly  
14  
15 estimate the number of vaccine recipients who are (or are not) experiencing an AEFI without relying  
16  
17 on complex analytical methods.  
18

19  
20 There are several limitations of AusVaxSafety surveillance and the analysis in this report. Firstly, self-  
21  
22 or parent/carer-reports of outcomes gathered through participant-based feedback may be less  
23  
24 accurate for common and expected reactions than those solicited from clinical trial participants.  
25  
26 Secondly, though we have attempted to adjust for potential biases by reporting the more objective  
27  
28 outcomes of MA and fever, it should be noted that participant-reported fever is subjective and has  
29  
30 not been confirmed. Also, should a very serious event, such as death, occur post-immunisation, an  
31  
32 individual may not be capable of participating in AusVaxSafety surveillance; the system may  
33  
34 therefore not identify the most serious adverse events. Thirdly, not all adverse events are vaccine-  
35  
36 attributable, and AEFI rates may be affected by other illnesses with similar outcomes, e.g. fever from  
37  
38 intercurrent viral illness. Finally, in this report, data did not allow for comparisons of the  
39  
40 reactogenicity of each non-influenza vaccine administered alone, and therefore conclusions made  
41  
42 about increased adverse event rates associated with concomitant vaccination must be tempered. As  
43  
44 AusVaxSafety expands to include safety surveillance for more vaccines, the system's capacity to  
45  
46 make such comparisons and provide data on the reactogenicity of more and varied vaccines will be  
47  
48 enhanced.  
49  
50  
51  
52  
53  
54  
55  
56  
57  
58  
59  
60

## CONCLUSIONS

Approximately 74,000 influenza vaccine recipients reported low adverse event rates following immunisation with the four brands of QIV used in Australia in 2017. Concomitant vaccination was associated with an increased AEFI risk, but rates were still low and within expected ranges. Our novel participant-based post-marketing vaccine safety surveillance system is a valuable tool for monitoring immunisation, especially for annually changing influenza vaccines.

## ACKNOWLEDGEMENTS

We would like to thank the AusVaxSafety Steering Committee members for their contribution to oversight of the 2017 surveillance efforts. We would also like to express our gratitude to the staff at participating hospitals, clinics, general practices and jurisdictional health departments, as well as the vaccine recipients who participated in this surveillance. AusVaxSafety would like to thank the three contributing data monitoring platforms: Vaxtracker, STARSS, and in particular SmartVax, which provided the majority of the 2017 influenza vaccine surveillance data, and particularly acknowledge the contribution of and technological expertise of Ian Peters, co-developer of SmartVax. Finally, we would like to acknowledge Chloe Damon for her excellent work coordinating the AusVaxSafety active surveillance system.

All authors made substantial contributions to the conception or design of the work; or the acquisition, analysis, or interpretation of data for the work; drafted the work or revised it critically for important intellectual content; had final approval of the version to be published; and agreed to be accountable for all aspects of the work in ensuring that questions related to the accuracy or integrity of any part of the work are appropriately investigated and resolved.

This manuscript was written on behalf of the AusVaxSafety Expert Leadership Group: Jim Buttery, Nigel Crawford, David Durrheim, Paul Effler and Nicholas Wood.

## REFERENCES

1. Palache A, Abelin A, Hollingsworth R, et al. Survey of distribution of seasonal influenza vaccine doses in 201 countries (2004-2015): The 2003 World Health Assembly resolution on seasonal influenza vaccination coverage and the 2009 influenza pandemic have had very little impact on improving influenza control and pandemic preparedness. *Vaccine* 2017;35(36):4681-86.
2. European Medicines Agency. Guideline on influenza vaccines non-clinical and clinical module. London, UK: European Medicines Agency, 2016.
3. Armstrong P, Dowse G, Effler P, et al. Epidemiological study of severe febrile reactions in young children in Western Australia caused by a 2010 trivalent inactivated influenza vaccine. *BMJ Open* 2011;1.
4. Blyth C, Richmond P, Jacoby P, et al. The impact of pandemic A(H1N1)pdm09 influenza and vaccine-associated adverse events on parental attitudes and influenza vaccine uptake in young children. *Vaccine* 2014;32:4075-81.
5. The Royal Children's Hospital Melbourne. Vaccination: perspectives of Australian parents. Australian child health poll. Melbourne 2017.
6. Pillsbury A, Cashman P, Leeb A, et al. Real-time safety surveillance of seasonal influenza vaccines in children, Australia, 2015. *Euro Surveill* 2015;20(43).
7. Pillsbury A, Quinn H, Cashman P, et al. Active SMS-based influenza vaccine safety surveillance in Australian children. *Vaccine* 2017;35(51):7101-06.
8. Leeb A, Regan A, Peters I, et al. Using automated text messages to monitor adverse events following immunisation in general practice. *Med J Aust* 2014;200(7):416-18.
9. Cashman P, Moberley S, Dalton C, et al. Vaxtracker: Active on-line surveillance for adverse events following inactivated influenza vaccine in children. *Vaccine* 2014;32(42):5503-08.
10. About STARSS Adelaide: The University of Adelaide; 2015 [Available from: <http://www.adelaide.edu.au/trials/starss/about-starss/> accessed May 9, 2017.
11. Grigg OA, Farewell VT, Spiegelhalter DJ. Use of risk-adjusted CUSUM and RSPRT charts for monitoring in medical contexts. *Stat Methods Med Res* 2003;12(2):147-70.
12. Blyth C, Markus T, Effler P, et al. Ensuring safety of the 2011 trivalent influenza vaccine young children. *Med J Aust* 2011;195(1):52.
13. Wood N, Blyth C, Willis G, et al. The safety of seasonal influenza vaccines in Australian children in 2013. *Med J Aust* 2014;201(10):596-600.
14. Li-Kim-Moy J, Yin J, Rashid H, et al. Systematic review of fever, febrile convulsions and serious adverse events following administration of inactivated trivalent influenza vaccines in children. *Eurosurveillance* 2015;20(24).
15. National Centre for Immunisation Research and Surveillance (NCIRS). AusVaxSafety Sydney, NSW, Australia,; NCIRS,; 2017 [Available from: <http://ausvaxsafety.org.au/> accessed 16 January 2018 2018.
16. Langley JM, Wang L, Aggarwal N, et al. Immunogenicity and Reactogenicity of an Inactivated Quadrivalent Influenza Vaccine Administered Intramuscularly to Children 6 to 35 Months of Age in 2012–2013: A Randomized, Double-Blind, Controlled, Multicenter, Multicountry, Clinical Trial. *J Pediatric Infect Dis Soc* 2015;4(3):242-51.
17. Beran J, Peeters M, Dewe W, et al. Immunogenicity and safety of quadrivalent versus trivalent inactivated influenza vaccine: a randomized, controlled trial in adults. *BMC Infect Dis* 2013;13.
18. Pepin S, Donazzolo Y, Jambrechina A, et al. Safety and immunogenicity of a quadrivalent inactivated influenza vaccine in adults. *Vaccine* 2013;31:5572-78.
19. Commonwealth of Australia Department of Health. Ground-breaking flu vaccines to protect millions of Aussies. Canberra: Commonwealth of Australia Department of Health, 2018.

- 1
  - 2
  - 3
  - 4
  - 5
  - 6
  - 7
  - 8
  - 9
  - 10
  - 11
  - 12
  - 13
  - 14
  - 15
  - 16
  - 17
  - 18
  - 19
  - 20
  - 21
  - 22
  - 23
  - 24
  - 25
  - 26
  - 27
  - 28
  - 29
  - 30
  - 31
  - 32
  - 33
  - 34
  - 35
  - 36
  - 37
  - 38
  - 39
  - 40
  - 41
  - 42
  - 43
  - 44
  - 45
  - 46
  - 47
  - 48
  - 49
  - 50
  - 51
  - 52
  - 53
  - 54
  - 55
  - 56
  - 57
  - 58
  - 59
  - 60
20. Hammitt LL, Bulkow LR, Singleton RJ, et al. Repeat revaccination with 23-valent pneumococcal polysaccharide vaccine among adults aged 55-74 years living in Alaska: no evidence of hyporesponsiveness. *Vaccine* 2011;29(12):2287-95.
21. Musher DM, Manoff SB, McFetridge RD, et al. Antibody persistence ten years after first and second doses of 23-valent pneumococcal polysaccharide vaccine, and immunogenicity and safety of second and third doses in older adults. *Hum Vaccin* 2011;7(9):919-28.
22. Booy R, Van der Meeren O, Ng SP, et al. A decennial booster dose of reduced antigen content diphtheria, tetanus, acellular pertussis vaccine (Boostrix™) is immunogenic and well tolerated in adults. *Vaccine* 2010;29(1):45-50.
23. Halperin SA, McNeil S, Langley J, et al. Tolerability and antibody response in adolescents and adults revaccinated with tetanus toxoid, reduced diphtheria toxoid, and acellular pertussis vaccine adsorbed (Tdap) 4-5 years after a previous dose. *Vaccine* 2011;29(46):8459-65.
24. Halperin SA, Sweet L, Baxendale D, et al. How soon after a prior tetanus-diphtheria vaccination can one give adult formulation tetanus-diphtheria-acellular pertussis vaccine? *Pediatr Infect Dis J* 2006;25(3):195-200.
25. Talbot EA, Brown KH, Kirkland KB, et al. The safety of immunizing with tetanus-diphtheria-acellular pertussis vaccine (Tdap) less than 2 years following previous tetanus vaccination: Experience during a mass vaccination campaign of healthcare personnel during a respiratory illness outbreak. *Vaccine* 2010;28(50):8001-7.
26. Oxman MN, Levin MJ, Johnson GR, et al. A vaccine to prevent herpes zoster and postherpetic neuralgia in older adults. *NEJM* 2005;352:2271-2284.
27. Frenck RW, Gurtman A, Rubino J, et al. Randomized, controlled trial of a 13-valent pneumococcal conjugate vaccine administered concomitantly with influenza vaccine in healthy adults. *Clin Vaccine Immunol* 2012;19(8):1296-303.
28. Schwarz TF, Flamaing J, Rumke HC, et al. A randomized, double-blind trial to evaluate immunogenicity and safety of 13-valent pneumococcal conjugate vaccine given concomitantly with trivalent influenza vaccine in adults aged ≥65 years. *Vaccine* 2011;29(32):5195-202.
29. Van Buynder PG, Frosst G, Van Buynder JL, et al. Increased reactions to pediatric influenza vaccination following concomitant pneumococcal vaccination. *Influenza and other respiratory viruses* 2012;7(2):184-90.
30. Sukumaran L, McCarthy NL, Kharbanda EO, et al. Safety of Tetanus Toxoid, Reduced Diphtheria Toxoid, and Acellular Pertussis and Influenza Vaccinations in Pregnancy. *Obstet Gynecol* 2015;126(5):1069-74.
31. Levin MJ, Buchwald UK, Gardner J, et al. Immunogenicity and safety of zoster vaccine live administered with quadrivalent influenza virus vaccine. *Vaccine* 2018;36(1).
32. Kerzner B, Murray AV, Cheng E, et al. Safety and immunogenicity profile of the concomitant administration of ZOSTAVAX and inactivated influenza vaccine in adults age 50 and older. *J Am Geriatr Soc* 2007;55(10):1499.
33. Weston WM, Chandrashekar V, Friedland LR, et al. Safety and immunogenicity of a tetanus toxoid, reduced diphtheria toxoid, and acellular pertussis vaccine when co-administered with influenza vaccine in adults. *Hum Vaccin* 2009;5(12):858-68.
34. de Lusignan S, Dos Santos G, Correa A, et al. Post-authorisation passive enhanced safety surveillance of seasonal influenza vaccines: protocol of a pilot study in England. *BMJ Open* 2017;7(5).
35. Stockwell MS, Marchant CD, Wodi AP, et al. A multi-site feasibility study to assess fever and wheezing in children after influenza vaccines using text messaging. *Vaccine* 2017;October 28
36. Bricout H, Chabanon AL, Souverain A, et al. Passive enhanced safety surveillance for Vaxigrip and Intanza 15 mg in the United Kingdom and Finland during the northern hemisphere influenza season 2015/16. *Eurosurveillance* 2017;22(18).

- 1  
2  
3 37. Stuurman AL, Verstraeten T, De Schryver A. Rapid assessment of the reactogenicity of a 2016-  
4 2017 seasonal influenza vaccine: results from a feasibility study. *Expert Rev Vaccines*  
5 2017;16(2):187-91.
- 6 38. Wilson K, Atkinson KM, Westeinde J, et al. An evaluation of the feasibility and usability of a proof  
7 of concept mobile app for adverse event reporting post influenza vaccination. *Hum Vaccin*  
8 *Immunother* 2016;12(7):1738-48.
- 9 39. McNeil MM, Gee J, Weintraub E, et al. The Vaccine Safety Datalink: successes and challenges  
10 monitoring vaccine safety. *Vaccine* 2014;32(42):5390-98.
- 11 40. Greene SK, Kulldorff M, Lewis EM, et al. Near real-time surveillance for influenza vaccine safety:  
12 proof-of-concept in the Vaccine Safety Datalink Project *Am J Epidemiol* 2010;171(2):177-88.  
13  
14  
15  
16  
17  
18  
19  
20  
21  
22  
23  
24  
25  
26  
27  
28  
29  
30  
31  
32  
33  
34  
35  
36  
37  
38  
39  
40  
41  
42  
43  
44  
45  
46  
47  
48  
49  
50  
51  
52  
53  
54  
55  
56  
57  
58  
59  
60

For peer review only

**Figure 1. Enrollees and participants by epidemiological week and age group**

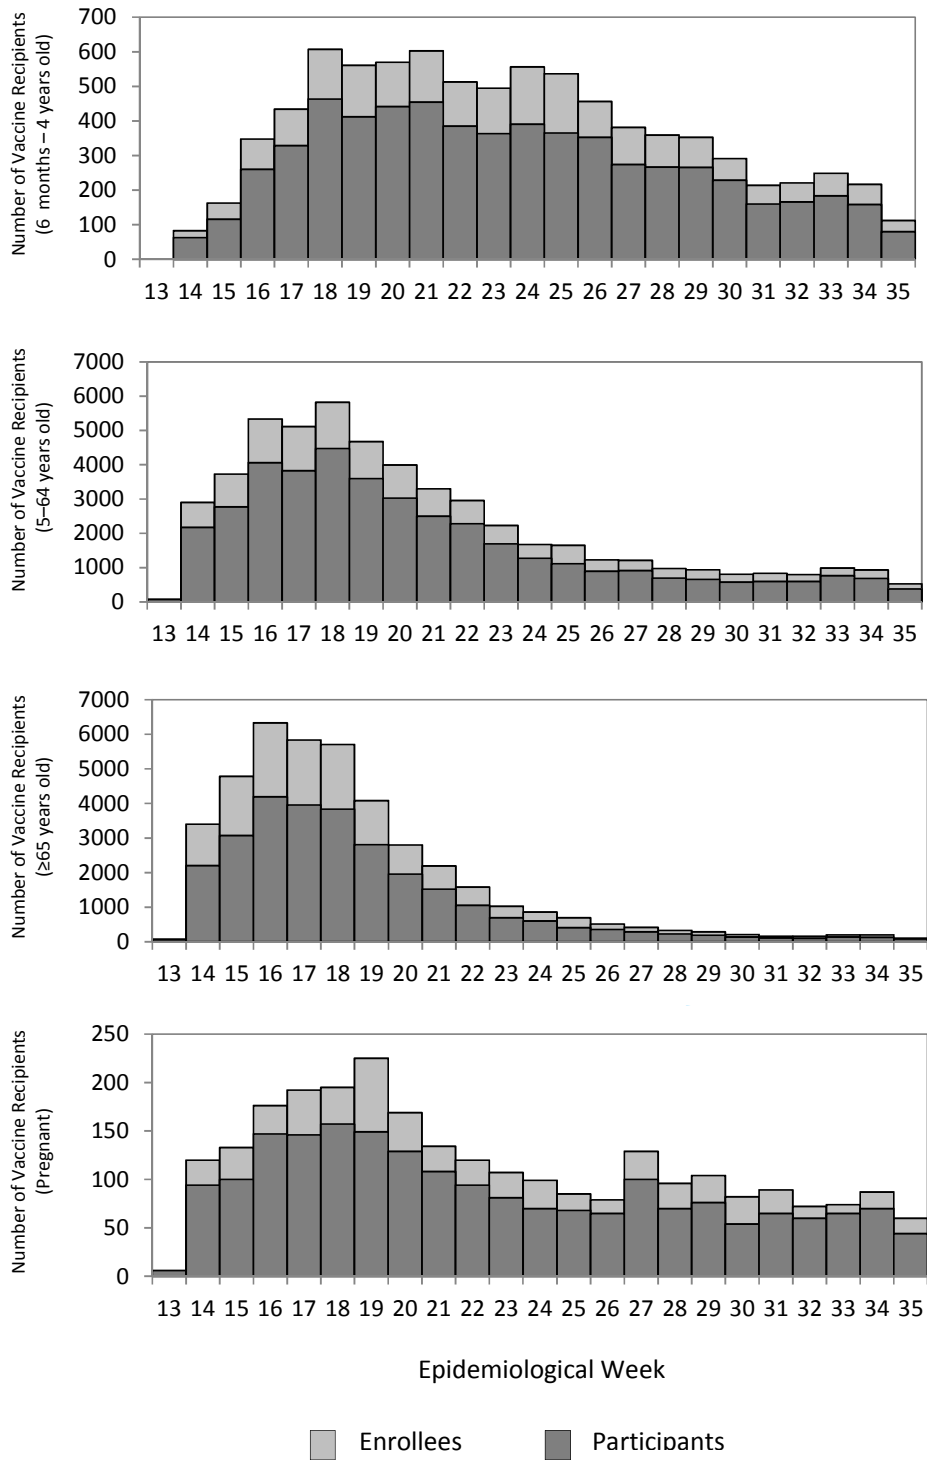

**Table 1. Descriptive variables of 73,892 participants in AusVaxSafety's 2017 influenza vaccine safety surveillance**

| Variable                                                       | Description                                | n (%)         |
|----------------------------------------------------------------|--------------------------------------------|---------------|
| Sex <sup>a</sup>                                               | Male                                       | 30,968 (41.9) |
|                                                                | Female                                     | 42,869 (58.1) |
| Indigenous status <sup>b</sup>                                 | Aboriginal                                 | 1,000 (1.7)   |
|                                                                | Torres Strait Islander                     | 32 (0.1)      |
|                                                                | Both                                       | 124 (0.2)     |
|                                                                | Total                                      | 1,156 (2.0)   |
| Pregnant <sup>c</sup>                                          | 2,018 (2.8)                                |               |
| Age median (IQR; range)                                        | 57 years (31–69 years; 6 months–102 years) |               |
| Age group                                                      | 6 months–4 years                           | 6,180 (8.4)   |
|                                                                | 5–14 years                                 | 4,415 (6.0)   |
|                                                                | 15–39 years                                | 13,434 (18.2) |
|                                                                | 40–64 years                                | 21,709 (29.4) |
|                                                                | ≥65 years                                  | 28,154 (38.1) |
| Number of participants receiving concomitant vaccine(s)        | 10,428 (14.1)                              |               |
| <i>Most common concomitant vaccines by group<sup>d,e</sup></i> |                                            |               |
| Overall (N = 10,428)                                           | 23vPPV                                     | 2,756 (26.4%) |
|                                                                | dTpa /dTpa-IPV                             | 2,504 (24.0%) |
|                                                                | Zoster                                     | 1,708 (16.4%) |
| 6 months–4 years (N = 1,295)                                   | DTPa-IPV                                   | 268 (20.7%)   |
|                                                                | HibMenCCV + MMR                            | 235 (18.1%)   |
|                                                                | MenBV                                      | 206 (15.9%)   |
|                                                                | DTPa + MMRV                                | 205 (15.8%)   |
| 5–14 years (N = 295)                                           | HPV                                        | 46 (15.6%)    |
|                                                                | Typhoid + Hepatitis A                      | 43 (14.6%)    |
|                                                                | Hepatitis A                                | 39 (13.2%)    |
|                                                                | MenBV                                      | 34 (11.5%)    |
| 15–39 years (N = 2,612)                                        | dTpa /dTpa-IPV                             | 1,743 (66.7%) |
|                                                                | Typhoid-Hepatitis A                        | 94 (3.6%)     |
|                                                                | Hepatitis A                                | 85 (3.3%)     |
| 40–64 years (N = 1,516)                                        | dTpa /dTpa-IPV                             | 534 (35.2%)   |
|                                                                | 23vPPV                                     | 311 (20.5%)   |
|                                                                | Typhoid                                    | 87 (5.7%)     |
| ≥65 years (N = 4,710)                                          | 23vPPV                                     | 2,403 (51.0%) |
|                                                                | Zoster                                     | 1,699 (36.1%) |
|                                                                | dTpa /dTpa-IPV                             | 220 (4.7%)    |
| Pregnant <sup>f</sup> (N = 634)                                | dTpa /dTpa-IPV                             | 633 (99.8%)   |
|                                                                | dTpa /dTpa-IPV + Hepatitis B               | 1 (0.2%)      |

<sup>a</sup> Sex available for N = 73,837 participants.

<sup>b</sup> Indigenous status available for N = 58,145 participants.

<sup>c</sup> Pregnancy status available for N = 72,951 participants (SmartVax only).

<sup>d</sup> The percentages listed under "concomitant vaccines" are the percentage of all concomitant vaccine(s) administered per group.

1  
2  
3 <sup>e</sup> + indicates two separate vaccines administered concomitantly.

4 <sup>f</sup> Pregnant participants are also included in their respective age categories (age range: 15–49 years).

5 Abbreviations: IQR: interquartile range; MMR: measles mumps rubella; 23vPPV: 23-valent pneumococcal  
6 polysaccharide vaccine. DTPa: Diphtheria tetanus acellular pertussis (for children aged <10 years); DTPa-IPV:  
7 DTPa-inactivated polio vaccine (for children aged <10 years); dTpa: diphtheria tetanus acellular pertussis (for  
8 individuals aged ≥10 years); dTpa-IPV: dTpa-inactivated polio vaccine (for individuals aged ≥10 years);  
9 HibMenC: *Haemophilus influenzae* type B meningococcal C conjugate vaccine; MenBV: meningococcal B  
10 vaccine  
11  
12  
13  
14  
15  
16  
17  
18  
19  
20  
21  
22  
23  
24  
25  
26  
27  
28  
29  
30  
31  
32  
33  
34  
35  
36  
37  
38  
39  
40  
41  
42  
43  
44  
45  
46  
47  
48  
49  
50  
51  
52  
53  
54  
55  
56  
57  
58  
59  
60

For peer review only



**Table 2. Adverse event rates for influenza vaccine, by age group and pregnancy status**

| Type of Adverse Event <sup>a</sup> | Group [n/N (%)]    |                    |                     |                       |                       |                       | Total                 |
|------------------------------------|--------------------|--------------------|---------------------|-----------------------|-----------------------|-----------------------|-----------------------|
|                                    | 6 months–4 years   | 5–14 years         | 15–39 years         | 40–64 years           | ≥65 years             | Pregnant <sup>c</sup> |                       |
| Any adverse event <sup>b</sup>     | 522/6,180<br>(8.4) | 295/4,415<br>(6.7) | 836/13,434<br>(6.2) | 1,533/21,709<br>(7.1) | 1,695/28,154<br>(6.0) | 118/2,018<br>(5.8)    | 4,881/73,892<br>(6.6) |
| Fever <sup>b</sup>                 | 140/5,979<br>(2.3) | 54/4,266<br>(1.3)  | 121/13,020<br>(0.9) | 190/20,953<br>(0.9)   | 209/27,222<br>(0.8)   | 20/1,963<br>(1.0)     | 714/71,440<br>(1.0)   |
| Medical attendance <sup>b</sup>    | 59/6,180<br>(1.0)  | 21/4,415<br>(0.5)  | 75/13,434<br>(0.6)  | 94/21,709<br>(0.4)    | 77/28,154<br>(0.3)    | 10/2,018<br>(0.5)     | 326/73,892<br>(0.4)   |

<sup>a</sup> Denominators differ between any adverse event/medical attendance and fever because reports of fever are solicited in an online survey following the initial SMS regarding an AEFI, and not all participants complete the survey.

<sup>b</sup>  $p < .001$  for participants aged 6 months–4 years compared to all other age groups.

<sup>c</sup> Pregnant participants are also included in their respective age categories (age range: 15–49 years). They are not compared to another group in this table.

Table 3. Adverse event rates and relative risks by age group, pregnancy, and concomitant vaccine status

| Group                 | Type of Adverse Event <sup>a</sup>         |                         |                                     |                                            |                         |                                     |                                            |                         |                                     |
|-----------------------|--------------------------------------------|-------------------------|-------------------------------------|--------------------------------------------|-------------------------|-------------------------------------|--------------------------------------------|-------------------------|-------------------------------------|
|                       | Any adverse event [n/N (%)]                |                         |                                     | Fever [n/N (%)]                            |                         |                                     | Medical attendance [n/N (%)]               |                         |                                     |
|                       | Influenza vaccine + concomitant vaccine(s) | Influenza vaccine alone | Relative Risk (95% CI) <sup>b</sup> | Influenza vaccine + concomitant vaccine(s) | Influenza vaccine alone | Relative Risk (95% CI) <sup>b</sup> | Influenza vaccine + concomitant vaccine(s) | Influenza vaccine alone | Relative Risk (95% CI) <sup>b</sup> |
| 6 months–4 years      | 189/1,295<br>(14.6)                        | 333/4,885<br>(6.8)      | 2.1<br>(1.8–2.5)                    | 58/1,211<br>(4.8)                          | 82/4,768<br>(1.7)       | 2.8<br>(2.0–3.9)                    | 15/1,295<br>(1.2)                          | 44/4,885<br>(0.9)       | 1.3<br>(0.7–2.3)                    |
| 5–14 years            | 33/295<br>(11.2)                           | 262/4,120<br>(6.4)      | 1.8<br>(1.3–2.5)                    | 9/281<br>(3.2)                             | 45/3,985<br>(1.1)       | 2.8<br>(1.4–5.7)                    | 2/295<br>(0.7)                             | 19/4,120<br>(0.5)       | 1.5<br>(0.3–6.3)                    |
| 15–39 years           | 205/2,612<br>(7.8)                         | 631/10,822<br>(5.8)     | 1.4<br>(1.2–1.6)                    | 27/2,491<br>(1.1)                          | 94/10,529<br>(0.9)      | 1.2<br>(0.8–1.9)                    | 18/2,612<br>(0.7)                          | 57/10,822<br>(0.5)      | 1.3<br>(0.8–2.2)                    |
| 40–64 years           | 138/1,516<br>(9.1)                         | 1,395/20,193<br>(6.9)   | 1.3<br>(1.1–1.6)                    | 27/1,456<br>(1.9)                          | 163/19,497<br>(0.8)     | 2.2<br>(1.5–3.3)                    | 19/1,516<br>(1.3)                          | 75/20,193<br>(0.4)      | 3.4<br>(2.1–5.6)                    |
| ≥65 years             | 568/4,710<br>(12.1)                        | 1,127/23,444<br>(4.8)   | 2.5<br>(2.3–2.8)                    | 89/4,439<br>(2.0)                          | 120/22,783<br>(0.5)     | 3.8<br>(2.9–5.0)                    | 33/4,710<br>(0.7)                          | 44/23,444<br>(0.2)      | 3.7<br>(2.4–5.9)                    |
| Pregnant <sup>c</sup> | 57/634<br>(9.0)                            | 61/1,384<br>(4.4)       | 2.0<br>(1.4–2.9)                    | 7/602<br>(1.2)                             | 13/1,361<br>(1.0)       | 1.2<br>(0.5–3.0)                    | 2/634<br>(0.3)                             | 8/1,384<br>(0.6)        | 0.6<br>(0.1–2.6)                    |
| Total                 | 1,133/10,428<br>(10.9)                     | 3,748/63,464<br>(5.9)   | 1.8<br>(1.7–2.0)                    | 210/9,878<br>(2.1)                         | 504/61,562<br>(0.8)     | 2.6<br>(2.2–3.1)                    | 87/10,428<br>(0.8)                         | 239/63,464<br>(0.4)     | 2.2<br>(1.7–2.8)                    |

<sup>a</sup> Denominators differ between any adverse event/medical attendance and fever because reports of fever are solicited in an online survey following the initial SMS regarding an AEFI, and not all participants complete the survey.

<sup>b</sup> Relative risk of any adverse event, fever, or medical attendance for influenza vaccine administered with any concomitant vaccine(s) as compared to influenza vaccine administered alone.

<sup>c</sup> Pregnant participants are also included in their respective age categories (age range: 15–49 years).

**Table 4. Adverse event rates and relative risks by age group, pregnancy status, and vaccine brand**

| Group                         | Type of Adverse Event <sup>a</sup> |                       |                                              |                     |                      |                                              |                              |                      |                                              |
|-------------------------------|------------------------------------|-----------------------|----------------------------------------------|---------------------|----------------------|----------------------------------------------|------------------------------|----------------------|----------------------------------------------|
|                               | Any adverse event [n/N (%)]        |                       |                                              | Fever [n/n (%)]     |                      |                                              | Medical attendance [n/N (%)] |                      |                                              |
|                               | <i>FluQuadri</i>                   | <i>Fluarix Tetra</i>  | <i>Relative Risk<sup>b</sup></i><br>(95% CI) | <i>FluQuadri</i>    | <i>Fluarix Tetra</i> | <i>Relative Risk<sup>b</sup></i><br>(95% CI) | <i>FluQuadri</i>             | <i>Fluarix Tetra</i> | <i>Relative Risk<sup>b</sup></i><br>(95% CI) |
| <i>3–14 years<sup>c</sup></i> | 317/4,076<br>(7.8)                 | 150/2,203<br>(6.8)    | 1.1<br>(1.0–1.4)                             | 68/3,933<br>(1.7)   | 29/2,133<br>(1.4)    | 1.3<br>(0.8–2.0)                             | 14/4,076<br>(0.3)            | 20/2,203<br>(0.9)    | 0.4<br>(0.2–0.8)                             |
| <i>15–39 years</i>            | 479/7,484<br>(6.4)                 | 295/5,059<br>(5.8)    | 1.1<br>(1.0–1.3)                             | 65/7,254<br>(0.9)   | 46/4,908<br>(0.9)    | 1.0<br>(0.7–1.4)                             | 40/7,484<br>(0.5)            | 33/5,059<br>(0.7)    | 0.8<br>(0.5–1.3)                             |
| <i>40–64 years</i>            | 805/10,620<br>(7.6)                | 607/9,252<br>(6.6)    | 1.16<br>(1.0–1.3)                            | 101/10,237<br>(1.0) | 76/8,938<br>(0.9)    | 1.2<br>(0.9–1.6)                             | 45/10,620<br>(0.4)           | 42/9,252<br>(0.5)    | 0.9<br>(0.6–1.4)                             |
| <i>≥65 years</i>              | 638/8,916<br>(7.2)                 | 912/16,938<br>(5.4)   | 1.3<br>(1.2–1.5)                             | 81/8,587<br>(0.9)   | 117/16,426<br>(0.7)  | 1.3<br>(1.0–1.8)                             | 22/8,916<br>(0.2)            | 43/16,938<br>(0.3)   | 1.0<br>(0.6–1.6)                             |
| <i>Pregnant<sup>d</sup></i>   | 60/963<br>(6.2)                    | 43/901<br>(4.8)       | 1.3<br>(0.9–1.9)                             | 7/932<br>(0.8)      | 10/885<br>(1.1)      | 0.7<br>(0.3–1.7)                             | 4/963<br>(0.4)               | 6/901<br>(0.7)       | 0.6<br>(0.2–2.2)                             |
| <i>Total</i>                  | 2,239/31,096<br>(7.2)              | 1,964/33,452<br>(5.9) | 1.2<br>(1.2–1.3)                             | 317/30,136<br>(1.1) | 268/32,420<br>(0.8)  | 1.3<br>(1.1–1.5)                             | 121/31,096<br>(0.4)          | 138/33,452<br>(0.4)  | 0.9<br>(0.7–1.2)                             |

<sup>a</sup> Denominators differ between any adverse event/medical attendance and fever because reports of fever are solicited in an online survey following the initial SMS regarding an AEFI, and not all participants complete the survey.

<sup>b</sup> Relative risk of any adverse event or medical attendance for FluQuadri compared to Fluarix Tetra.

<sup>c</sup> Fluarix Tetra (GlaxoSmithKline) and FluQuadri (Sanofi-Aventis) are each licensed for use in individuals aged ≥3 years. We excluded n = 15 individuals aged 6 months–2 years who were reported to have received Fluarix Tetra, and n = 129 individuals aged 6 months–2 years who were reported to have received FluQuadri, from this analysis.

<sup>d</sup> Pregnant participants are also included in their respective age categories (age range: 15–49 years).

**eFigure1. Fast initial response cumulative sum (FIR CUSUM) safety signal detection charts for medical attendance during the surveillance period, by age group and pregnancy status**

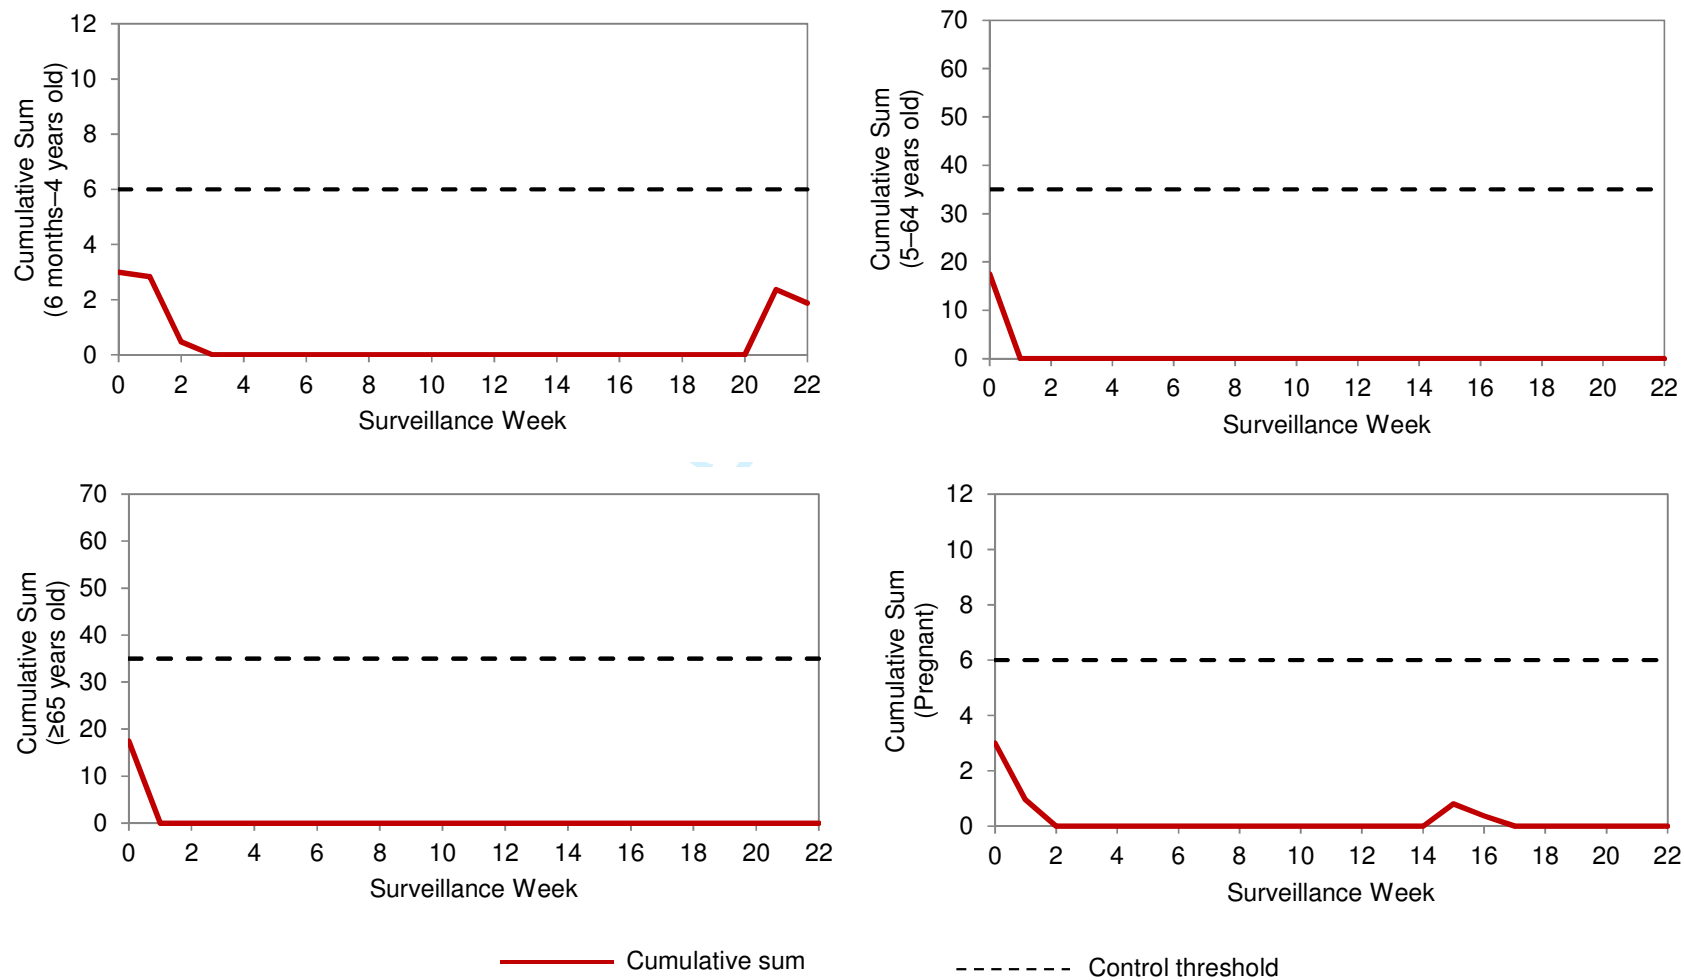

Note: Surveillance week 1 started on 1 April and ended on 9 April, for a total of 9 days. Surveillance week 22 started on 28 August and ended on 31 August, for a total of 4 days.

**eTable 1. Secondary outcome adverse event rates, by age group and pregnancy status**

| Adverse Event <sup>a</sup>                                       | 6 months–4 years   | 5–14 years        | 15–39 years         | 40–64 years         | ≥65 years           | Pregnant <sup>b</sup> | Total                 |
|------------------------------------------------------------------|--------------------|-------------------|---------------------|---------------------|---------------------|-----------------------|-----------------------|
| <i>Pain at the injection site</i>                                | 113/5,979<br>(1.9) | 86/4,266<br>(2.0) | 255/13,020<br>(2.0) | 419/20,953<br>(2.0) | 354/27,222<br>(1.3) | 36/1,963<br>(1.8)     | 1,227/71,440<br>(1.7) |
| <i>Tired/fatigued<sup>c</sup></i>                                | 83/5,571<br>(1.5)  | 52/4,249<br>(1.2) | 183/12,862<br>(1.4) | 368/20,661<br>(1.8) | 331/27,069<br>(1.2) | 22/1,961<br>(1.1)     | 1,017/70,412<br>(1.4) |
| <i>Swelling and/or redness at the injection site<sup>d</sup></i> | 95/5,968<br>(1.6)  | 71/4,255<br>(1.7) | 172/12,875<br>(1.3) | 306/20,692<br>(1.5) | 289/27,127<br>(1.1) | 24/1,963<br>(1.2)     | 933/70,917<br>(1.3)   |
| <i>Headache<sup>c</sup></i>                                      | 7/5,567<br>(0.1)   | 42/4,247<br>(1.0) | 155/12,859<br>(1.2) | 286/20,659<br>(1.4) | 231/27,060<br>(0.9) | 26/1,960<br>(1.3)     | 721/70,392<br>(1.0)   |
| <i>Sleep pattern change<sup>c</sup></i>                          | 55/5,570<br>(1.0)  | 28/4,248<br>(0.7) | 53/12,851<br>(0.4)  | 111/20,648<br>(0.5) | 101/27,029<br>(0.4) | 5/1,960<br>(0.3)      | 348/70,346<br>(0.5)   |
| <i>Irritable<sup>c</sup></i>                                     | 94/5,571<br>(1.7)  | 21/4,245<br>(0.5) | 56/12,855<br>(0.4)  | 77/20,641<br>(0.4)  | 56/27,016<br>(0.2)  | 5/1,961<br>(0.3)      | 304/70,328<br>(0.4)   |
| <i>Rash<sup>e</sup></i>                                          | 31/5,979<br>(0.5)  | 10/4,266<br>(0.2) | 26/13,020<br>(0.2)  | 40/20,953<br>(0.2)  | 70/27,222<br>(0.3)  | 1/1,963<br>(0.1)      | 177/71,440<br>(0.2)   |
| <i>Vomiting<sup>c</sup></i>                                      | 29/5,568<br>(0.5)  | 8/4,246<br>(0.2)  | 33/12,849<br>(0.3)  | 27/20,643<br>(0.1)  | 12/27,011<br>(0.04) | 9/1,960<br>(0.5)      | 109/70,317<br>(0.2)   |
| <i>Diarrhea<sup>c</sup></i>                                      | 15/5,567<br>(0.3)  | 4/4,246<br>(0.1)  | 26/12,851<br>(0.2)  | 41/20,644<br>(0.2)  | 33/27,018<br>(0.1)  | 3/1,960<br>(0.2)      | 119/70,326<br>(0.2)   |
| <i>Rigors<sup>f</sup></i>                                        | 7/5,579<br>(0.1)   | 3/4,257<br>(0.1)  | 15/12,997<br>(0.1)  | 34/20,903<br>(0.2)  | 34/27,113<br>(0.1)  | 2/1,960<br>(0.1)      | 93/70,849<br>(0.1)    |
| <i>Non-responsiveness/loss of consciousness<sup>c</sup></i>      | 0/5,567<br>(0.0)   | 0/4,245<br>(0.0)  | 0/12,848<br>(0.0)   | 1/20,637<br>(0.005) | 2/27,010<br>(0.007) | 0/1,960<br>(0.0)      | 3/70,307<br>(0.004)   |
| <i>Convulsions/seizures<sup>g</sup></i>                          | 0/5,979<br>(0.0)   | 0/4,266<br>(0.0)  | 0/13,020<br>(0.0)   | 0/20,953<br>(0.0)   | 2/27,222<br>(0.007) | 0/1,963<br>(0)        | 2/71,440<br>(0.003)   |
| <i>Other<sup>h</sup></i>                                         | 86/5,979<br>(1.4)  | 28/4,266<br>(0.7) | 88/13,020<br>(0.7)  | 196/20,953<br>(0.9) | 247/27,222<br>(0.9) | 13/1,963<br>(0.7)     | 645/71,440<br>(0.9)   |

<sup>a</sup> Denominators differ between adverse events because symptoms are solicited in an online survey following the initial SMS regarding an AEFI, and not all participants complete the survey.

<sup>b</sup> Pregnant participants are also included in their respective age categories (age range: 15–49 years).

<sup>c</sup> Collected by SmartVax only.

<sup>d</sup> SmartVax and STARSS collect data on injection site swelling and/or redness in one question, while Vaxtracker has separate questions for injection site redness and injection site swelling. The Vaxtracker data for injection site redness and injection site swelling have been combined for this table.

<sup>e</sup> STARSS specifies that the rash is over a large area of the body.

<sup>f</sup> SmartVax includes a description (“shaking or shivering with high temperature”), while STARSS and Vaxtracker do not refer to rigors and instead collect data on “chills and shakes”.

<sup>g</sup> SmartVax collects data on “convulsions/seizures”, while Vaxtracker collects information on “seizures”, and STARSS collects information on “seizures or fits”.

<sup>h</sup> A free-text response box is provided for participants responding that they had an “Other” reaction to describe the event(s).

**eTable 2. Primary and secondary outcome adverse event rates, by vaccine brand<sup>a</sup>**

| Adverse event <sup>b</sup>                                       | Afluria Quad       | Fluarix Tetra         | FluQuadri             | FluQuadri Junior   |
|------------------------------------------------------------------|--------------------|-----------------------|-----------------------|--------------------|
| <i>Any event</i>                                                 | 316/4,857<br>(6.5) | 1,965/33,467<br>(5.9) | 2,250/31,225<br>(7.2) | 336/4,147<br>(8.1) |
| <i>Fever</i>                                                     | 32/4,679<br>(0.7)  | 268/32,420<br>(0.8)   | 317/30,136<br>(1.1)   | 96/4,016<br>(2.4)  |
| <i>Medical attention</i>                                         | 20/4,857<br>(0.4)  | 138/33,467<br>(0.4)   | 121/31,225<br>(0.4)   | 46/4,147<br>(1.1)  |
| <i>Pain at the injection site</i>                                | 70/4,679<br>(1.5)  | 460/32,420<br>(1.4)   | 646/30,136<br>(2.1)   | 48/4,016<br>(1.2)  |
| <i>Tired/fatigued<sup>c</sup></i>                                | 55/4,618<br>(1.2)  | 422/31,974<br>(1.3)   | 488/29,875<br>(1.6)   | 50/3,757<br>(1.3)  |
| <i>Swelling and/or redness at the injection site<sup>d</sup></i> | 59/4,624<br>(1.3)  | 350/32,062<br>(1.1)   | 474/30,030<br>(1.6)   | 47/4,012<br>(1.2)  |
| <i>Headache<sup>c</sup></i>                                      | 50/4,614<br>(1.1)  | 298/31,967<br>(0.9)   | 371/29,868<br>(1.2)   | 2/3,755<br>(0.1)   |
| <i>Sleep pattern change<sup>c</sup></i>                          | 15/4,614<br>(0.3)  | 121/31,938<br>(0.4)   | 171/29,850<br>(0.6)   | 41/3,756<br>(1.1)  |
| <i>Irritable<sup>c</sup></i>                                     | 17/4,613<br>(0.4)  | 91/31,928<br>(0.3)    | 128/29,842<br>(0.4)   | 68/3,757<br>(1.8)  |
| <i>Rash<sup>e</sup></i>                                          | 8/4,679<br>(0.2)   | 58/32,420<br>(0.2)    | 91/30,136<br>(0.3)    | 20/4,016<br>(0.5)  |
| <i>Vomiting<sup>c</sup></i>                                      | 3/4,611<br>(0.1)   | 39/31,924<br>(0.1)    | 48/29,838<br>(0.2)    | 19/3,756<br>(0.5)  |
| <i>Diarrhea<sup>c</sup></i>                                      | 7/4,613<br>(0.2)   | 42/31,931<br>(0.1)    | 57/29,839<br>(0.2)    | 13/3,755<br>(0.3)  |
| <i>Rigors<sup>f</sup></i>                                        | 5/4,667<br>(0.1)   | 39/32,287<br>(0.1)    | 45/29,947<br>(0.2)    | 4/3,760<br>(0.1)   |
| <i>Non-responsiveness/loss of consciousness<sup>c</sup></i>      | 0/4,611<br>(0.0)   | 1/31,920<br>(0.003)   | 2/29,833<br>(0.007)   | 0/3,755<br>(0.0)   |
| <i>Convulsions/seizures<sup>g</sup></i>                          | 0/4,679<br>(0.0)   | 1/32,420<br>(0.003)   | 1/30,136<br>(0.003)   | 0/4,016<br>(0.0)   |
| <i>Other<sup>h</sup></i>                                         | 40/4,679<br>(0.9)  | 255/32,420<br>(0.8)   | 286/30,136<br>(0.9)   | 61/4,016<br>(1.5)  |

Median age for each brand (interquartile range): Afluria Quad: 63 years (47–71 years), Fluarix Tetra: 65 years (45–71 years), FluQuadri: 51 years (29–66 years), FluQuadri Junior: 1 year (1–2 years)

<sup>a</sup> Vaccine brand could not be determined for 196 participants (0.3%), who were excluded from this analysis.

<sup>b</sup> Denominators differ between adverse events because symptoms are solicited in an online survey following the initial SMS regarding an AEFI, and not all participants complete the survey.

<sup>c</sup> Collected by SmartVax only.

<sup>d</sup> SmartVax and STARSS collect data on injection site swelling and/or redness in one question, while Vaxtracker has separate questions for injection site redness and injection site swelling. The Vaxtracker data for injection site redness and injection site swelling have been combined for this table.

<sup>e</sup> STARSS specifies that the rash is over a large area of the body.

<sup>f</sup> SmartVax includes a description (“shaking or shivering with high temperature”), while STARSS and Vaxtracker do not refer to rigors and instead collect data on “chills and shakes”.

<sup>g</sup> SmartVax collects data on “convulsions/seizures”, while Vaxtracker collects information on “seizures”, and STARSS collects information on “seizures or fits”.

<sup>h</sup> A free-text response box is provided for participants responding that they had an “Other” reaction to describe the event(s).

**STROBE 2007 (v4) Statement—Checklist of items that should be included in reports of cohort studies**

| Section/Topic             | Item # | Recommendation                                                                                                                                                                       | Reported on page # |
|---------------------------|--------|--------------------------------------------------------------------------------------------------------------------------------------------------------------------------------------|--------------------|
| Title and abstract        | 1      | (a) Indicate the study’s design with a commonly used term in the title or the abstract                                                                                               | 1                  |
|                           |        | (b) Provide in the abstract an informative and balanced summary of what was done and what was found                                                                                  | 4-5                |
| <b>Introduction</b>       |        |                                                                                                                                                                                      |                    |
| Background/rationale      | 2      | Explain the scientific background and rationale for the investigation being reported                                                                                                 | 6-7                |
| Objectives                | 3      | State specific objectives, including any prespecified hypotheses                                                                                                                     | 7                  |
| <b>Methods</b>            |        |                                                                                                                                                                                      |                    |
| Study design              | 4      | Present key elements of study design early in the paper                                                                                                                              | 7-11               |
| Setting                   | 5      | Describe the setting, locations, and relevant dates, including periods of recruitment, exposure, follow-up, and data collection                                                      | 7-8                |
| Participants              | 6      | (a) Give the eligibility criteria, and the sources and methods of selection of participants. Describe methods of follow-up                                                           | 7-8                |
|                           |        | (b) For matched studies, give matching criteria and number of exposed and unexposed                                                                                                  | N/A                |
| Variables                 | 7      | Clearly define all outcomes, exposures, predictors, potential confounders, and effect modifiers. Give diagnostic criteria, if applicable                                             | 8                  |
| Data sources/ measurement | 8*     | For each variable of interest, give sources of data and details of methods of assessment (measurement). Describe comparability of assessment methods if there is more than one group | 7-10               |
| Bias                      | 9      | Describe any efforts to address potential sources of bias                                                                                                                            | None               |
| Study size                | 10     | Explain how the study size was arrived at                                                                                                                                            | N/A                |
| Quantitative variables    | 11     | Explain how quantitative variables were handled in the analyses. If applicable, describe which groupings were chosen and why                                                         | 9-11               |
| Statistical methods       | 12     | (a) Describe all statistical methods, including those used to control for confounding                                                                                                | 10-11              |
|                           |        | (b) Describe any methods used to examine subgroups and interactions                                                                                                                  | 10-11              |
|                           |        | (c) Explain how missing data were addressed                                                                                                                                          | N/A                |
|                           |        | (d) If applicable, explain how loss to follow-up was addressed                                                                                                                       | N/A                |
|                           |        | (e) Describe any sensitivity analyses                                                                                                                                                | N/A                |
| <b>Results</b>            |        |                                                                                                                                                                                      |                    |

|                          |     |                                                                                                                                                                                                              |              |
|--------------------------|-----|--------------------------------------------------------------------------------------------------------------------------------------------------------------------------------------------------------------|--------------|
| Participants             | 13* | (a) Report numbers of individuals at each stage of study—eg numbers potentially eligible, examined for eligibility, confirmed eligible, included in the study, completing follow-up, and analysed            | 11-12        |
|                          |     | (b) Give reasons for non-participation at each stage                                                                                                                                                         | N/A          |
|                          |     | (c) Consider use of a flow diagram                                                                                                                                                                           | -            |
| Descriptive data         | 14* | (a) Give characteristics of study participants (eg demographic, clinical, social) and information on exposures and potential confounders                                                                     | 11-12; 21-22 |
|                          |     | (b) Indicate number of participants with missing data for each variable of interest                                                                                                                          | 21-22        |
|                          |     | (c) Summarise follow-up time (eg, average and total amount)                                                                                                                                                  | -            |
| Outcome data             | 15* | Report numbers of outcome events or summary measures over time                                                                                                                                               | 11-12; 23-25 |
| Main results             | 16  | (a) Give unadjusted estimates and, if applicable, confounder-adjusted estimates and their precision (eg, 95% confidence interval). Make clear which confounders were adjusted for and why they were included | 21-25        |
|                          |     | (b) Report category boundaries when continuous variables were categorized                                                                                                                                    | -            |
|                          |     | (c) If relevant, consider translating estimates of relative risk into absolute risk for a meaningful time period                                                                                             | -            |
| Other analyses           | 17  | Report other analyses done—eg analyses of subgroups and interactions, and sensitivity analyses                                                                                                               | 11-12; 23-25 |
| <b>Discussion</b>        |     |                                                                                                                                                                                                              |              |
| Key results              | 18  | Summarise key results with reference to study objectives                                                                                                                                                     | 12-15        |
| <b>Limitations</b>       |     |                                                                                                                                                                                                              |              |
| Interpretation           | 20  | Give a cautious overall interpretation of results considering objectives, limitations, multiplicity of analyses, results from similar studies, and other relevant evidence                                   | 12-15        |
| Generalisability         | 21  | Discuss the generalisability (external validity) of the study results                                                                                                                                        | 13-15        |
| <b>Other information</b> |     |                                                                                                                                                                                                              |              |
| Funding                  | 22  | Give the source of funding and the role of the funders for the present study and, if applicable, for the original study on which the present article is based                                                | 5            |

\*Give information separately for cases and controls in case-control studies and, if applicable, for exposed and unexposed groups in cohort and cross-sectional studies.

**Note:** An Explanation and Elaboration article discusses each checklist item and gives methodological background and published examples of transparent reporting. The STROBE checklist is best used in conjunction with this article (freely available on the Web sites of PLoS Medicine at <http://www.plosmedicine.org/>, Annals of Internal Medicine at <http://www.annals.org/>, and Epidemiology at <http://www.epidem.com/>). Information on the STROBE Initiative is available at [www.strobe-statement.org](http://www.strobe-statement.org).



# BMJ Open

## Active surveillance of 2017 seasonal influenza vaccine safety: an observational cohort study of individuals aged 6 months and older in Australia

|                                 |                                                                                                                                                                                                                                                                                                                                                                                                                                                                                                                                                                                                                                                                                                                                                                                                                                                                                                                                                                                                                                                                                                                                                                                                                                                                                                                                                                                                             |
|---------------------------------|-------------------------------------------------------------------------------------------------------------------------------------------------------------------------------------------------------------------------------------------------------------------------------------------------------------------------------------------------------------------------------------------------------------------------------------------------------------------------------------------------------------------------------------------------------------------------------------------------------------------------------------------------------------------------------------------------------------------------------------------------------------------------------------------------------------------------------------------------------------------------------------------------------------------------------------------------------------------------------------------------------------------------------------------------------------------------------------------------------------------------------------------------------------------------------------------------------------------------------------------------------------------------------------------------------------------------------------------------------------------------------------------------------------|
| Journal:                        | <i>BMJ Open</i>                                                                                                                                                                                                                                                                                                                                                                                                                                                                                                                                                                                                                                                                                                                                                                                                                                                                                                                                                                                                                                                                                                                                                                                                                                                                                                                                                                                             |
| Manuscript ID                   | bmjopen-2018-023263.R1                                                                                                                                                                                                                                                                                                                                                                                                                                                                                                                                                                                                                                                                                                                                                                                                                                                                                                                                                                                                                                                                                                                                                                                                                                                                                                                                                                                      |
| Article Type:                   | Research                                                                                                                                                                                                                                                                                                                                                                                                                                                                                                                                                                                                                                                                                                                                                                                                                                                                                                                                                                                                                                                                                                                                                                                                                                                                                                                                                                                                    |
| Date Submitted by the Author:   | 13-Jul-2018                                                                                                                                                                                                                                                                                                                                                                                                                                                                                                                                                                                                                                                                                                                                                                                                                                                                                                                                                                                                                                                                                                                                                                                                                                                                                                                                                                                                 |
| Complete List of Authors:       | <p>Pillsbury, Alexis; National Centre for Immunisation Research and Surveillance, The Children's Hospital at Westmead<br/> Glover, Catherine; National Centre for Immunisation Research and Surveillance, The Children's Hospital at Westmead<br/> Jacoby, Peter; Telethon Kids Institute, Wesfarmers Centre of Vaccines and Infectious Diseases<br/> Quinn, Helen; National Centre for Immunisation Research and Surveillance, The Children's Hospital at Westmead; The University of Sydney, Discipline of Paediatrics and Child Health<br/> Fathima, Parveen; Telethon Kids Institute, Wesfarmers Centre of Vaccines and Infectious Diseases<br/> Cashman, PM; Hunter New England Population Health, Newcastle, New South Wales<br/> Leeb, Alan; SmartVax, c/o Illawarra Medical Centre; Illawarra Medical Centre<br/> Blyth, Christopher C.; Telethon Kids Institute, Wesfarmers Centre of Vaccines and Infectious Diseases; University of Western Australia, School of Medicine<br/> Gold, Michael ; University of Adelaide, Discipline of Paediatrics<br/> Snelling, Tom; Princess Margaret Hospital for Children; Telethon Kids Institute, Wesfarmers Centre of Vaccines and Infectious Diseases<br/> Macartney, Kristine; National Centre for Immunisation Research and Surveillance, The Children's Hospital at Westmead; The University of Sydney, Discipline of Paediatrics and Child Health</p> |
| <b>Primary Subject Heading</b>: | Epidemiology                                                                                                                                                                                                                                                                                                                                                                                                                                                                                                                                                                                                                                                                                                                                                                                                                                                                                                                                                                                                                                                                                                                                                                                                                                                                                                                                                                                                |
| Secondary Subject Heading:      | Infectious diseases, Public health                                                                                                                                                                                                                                                                                                                                                                                                                                                                                                                                                                                                                                                                                                                                                                                                                                                                                                                                                                                                                                                                                                                                                                                                                                                                                                                                                                          |
| Keywords:                       | Epidemiology < INFECTIOUS DISEASES, vaccine safety, active surveillance                                                                                                                                                                                                                                                                                                                                                                                                                                                                                                                                                                                                                                                                                                                                                                                                                                                                                                                                                                                                                                                                                                                                                                                                                                                                                                                                     |
|                                 |                                                                                                                                                                                                                                                                                                                                                                                                                                                                                                                                                                                                                                                                                                                                                                                                                                                                                                                                                                                                                                                                                                                                                                                                                                                                                                                                                                                                             |

SCHOLARONE™  
Manuscripts

**TITLE**

Active surveillance of 2017 seasonal influenza vaccine safety: an observational cohort study of individuals aged 6 months and older in Australia

**AUTHORS**

Alexis J Pillsbury, MPhil App Epi<sup>a</sup>

Catherine Glover, MS<sup>a</sup>

Peter Jacoby, MSc<sup>b</sup>

Helen E Quinn, PhD<sup>a,c</sup>

Parveen Fathima, MID<sup>b</sup>

Patrick Cashman, MPHTM<sup>d</sup>

Alan Leeb, FRACGP<sup>e,f</sup>

Christopher C Blyth, PhD<sup>b,g,h,i</sup>

Michael S Gold, MD<sup>j</sup>

Thomas Snelling, PhD<sup>b,h,k,l</sup>

Kristine K Macartney, MD<sup>a,c,m</sup>

**AFFILIATIONS**

<sup>a</sup>National Centre for Immunisation Research and Surveillance, The Children's Hospital at Westmead, New South Wales, Australia

<sup>b</sup>Wesfarmers Centre of Vaccines and Infectious Diseases, Telethon Kids Institute, Perth, Western Australia, Australia

1  
2  
3 <sup>c</sup>Discipline of Paediatrics and Child Health, University of Sydney, New South Wales, Australia  
4

5 <sup>d</sup>Hunter New England Population Health, Newcastle, New South Wales, Australia  
6  
7

8 <sup>e</sup>SmartVax, c/o Illawarra Medical Centre, Ballajura, Western Australia, Australia  
9

10  
11 <sup>f</sup>Illawarra Medical Centre, Ballajura, Western Australia, Australia  
12  
13

14 <sup>g</sup>School of Medicine, University of Western Australia, Western Australia, Australia  
15

16  
17 <sup>h</sup>Princess Margaret Hospital for Children, Perth, Western Australia, Australia  
18  
19

20 <sup>i</sup>Department of Microbiology, PathWest Laboratory Medicine WA, QEII Medical Centre, Perth,  
21  
22 Western Australia, Australia  
23  
24

25 <sup>j</sup>School of Medicine, Discipline of Paediatrics, University of Adelaide, Adelaide, Australia  
26  
27

28 <sup>k</sup>Curtin University, School of Public Health, Perth, Western Australia, Australia  
29  
30

31 <sup>l</sup>Menzies School of Health Research and Charles Darwin University, Darwin, Northern Territory,  
32  
33 Australia  
34  
35

36 <sup>m</sup>Department of Microbiology and Infectious Disease, The Children's Hospital at Westmead, New  
37  
38 South Wales, Australia  
39  
40

#### 41 **CONTACT INFORMATION FOR CORRESPONDING AUTHOR** 42

43 Alexis Pillsbury  
44

45 National Centre for Immunisation Research and Surveillance  
46

47 Westmead, NSW 2145, Australia  
48

49 [alexis.pillsbury@health.nsw.gov.au](mailto:alexis.pillsbury@health.nsw.gov.au)  
50

51 61 2 9845 1497  
52  
53  
54  
55  
56  
57  
58  
59  
60

**EMAIL ADDRESSES OF OTHER AUTHORS**

Catherine Glover (Catherine.Glover1@health.nsw.gov.au)

Peter Jacoby (Peter.Jacoby@telethonkids.org.au)

Helen E Quinn (Helen.Quinn@health.nsw.gov.au)

Parveen Fathima (Parveen.Fathima@telethongkids.org.au)

Patrick Cashman (Patrick.Cashman@hnehealth.nsw.gov.au)

Alan Leeb (alan@illawarramedical.com.au)

Christopher C Blyth (Christopher.Blyth@uwa.edu.au)

Michael S Gold (Michael.Gold@adelaide.edu.au)

Thomas Snelling (Tom.Snelling@telethonkids.org.au)

Kristine Macartney (Kristine.Macartney@health.nsw.gov.au)

**WORD COUNT**

**3599**

**KEY WORDS**

Infectious disease epidemiology; vaccine safety; active surveillance

## ABSTRACT

**Objective:** To actively solicit adverse events experienced in the days following immunisation with quadrivalent inactivated influenza vaccine using Australia's near real-time, participant-based vaccine safety surveillance system, AusVaxSafety.

**Design and setting:** Observational cohort study conducted in 194 sentinel surveillance immunisation sites (primary care, hospital, and community-based clinics) across Australia.

**Participants:** Individuals aged  $\geq 6$  months who received a routine seasonal influenza vaccine at a participating site (N=102,911) and responded to a survey (via Short Message Service or email) sent 3 days post-vaccination about adverse events experienced (N =73,892; 71.8%).

**Main Outcome Measure:** Near real-time and cumulative participant-reported rates of any adverse event, fever or medical attendance experienced within 3 days post-vaccination overall, by brand, age, pregnancy status, and concomitant vaccine receipt.

**Results:** Participant median age was 57 years (range: 6 months–102 years); 58.1% (N=42,869) were female and 2.7% (N=2,018) were pregnant. Near real-time fast initial response cumulative summation and Bayesian analyses of weekly event rates did not demonstrate a safety signal. Children aged 6 months–4 years had higher event rates (522/6,180; 8.4%) compared to older ages; participants aged  $\geq 65$  years reported fewer events (1,695/28,154; 6.0%). There were no clinically significant differences in safety between brands, by age group or overall. Cumulative data analysis demonstrated that concomitant vaccination was associated with increased rates of fever (2.1% versus 0.8%) and medical attendance (0.8% versus 0.4%), although all rates were low and did not exceed expected levels.

**Conclusions:** Novel, post-marketing AusVaxSafety surveillance demonstrated comparable and expected safety outcomes for the 2017 quadrivalent inactivated influenza vaccines brands used in

1  
2  
3 Australia. These near real-time, participant-reported data are expected to encourage confidence in  
4  
5 vaccine safety and promote uptake.  
6  
7  
8  
9

## 10 **STRENGTHS AND LIMITATIONS OF THIS STUDY**

- 13 • A large number of vaccinated individuals of all ages across Australia participated, leading to  
14 a greater ability to detect serious adverse events.  
15
- 16 • Comprehensive data enabled analysis of adverse events with respect to age, pregnancy,  
17 vaccine brand, and concomitant vaccination with a wide variety of vaccines.  
18
- 19 • Safety signal detection was conducted in near real time using multiple statistical methods,  
20 with results reported to the public each week.  
21
- 22 • Individuals participating in active surveillance may be less inclined to report common and  
23 expected reactions, limiting the ability to compare reported adverse event rates with those  
24 from clinical trials.  
25
- 26 • Some outcomes of vaccine safety, such as participant-reported fever, are subjective and  
27 have not been verified.  
28  
29  
30  
31  
32  
33  
34  
35  
36  
37  
38  
39

## 40 **FUNDING**

41  
42 AusVaxSafety surveillance was funded under a contract with the Australian Government Department  
43 of Health.  
44  
45  
46

## 47 **COMPETING INTERESTS**

48  
49 All authors are either located at organisations that hold the AusVaxSafety contract from the  
50 Australian Government Department of Health or are subcontract holders. None of the authors has  
51 any other conflicts of interest to declare.  
52  
53  
54  
55  
56  
57  
58  
59  
60

## INTRODUCTION

Influenza vaccines are given to hundreds of millions of people within short, fixed periods of time worldwide each year.<sup>1</sup> This widespread use, coupled with the high degree of influenza vaccine variability, including multiple vaccine types (live, inactivated, subunit, or adjuvanted), manufacturing processes (in eggs, cell lines, or with recombinant techniques), and strain compositions (trivalent or quadrivalent, with the potential for vaccine viruses to change twice yearly across the Southern and Northern Hemisphere seasons), underscores the need for timely post-marketing vaccine safety surveillance. The European Medicines Agency (EMA) now requires manufacturers to address the paucity of clinical trial safety data available for vaccine changes by conducting enhanced post-marketing safety surveillance for seasonal influenza vaccines.<sup>2</sup>

AusVaxSafety, an automated, active vaccine safety surveillance system, reports near real-time, brand-specific data independently of manufacturers using participant-reported outcomes.

AusVaxSafety was established to improve vaccine safety monitoring following recommendations of an independent inquiry into the unprecedented increase in febrile seizures observed in young Australian children in 2010, ultimately determined to be associated with one influenza vaccine brand (Fluvax/Afluria; bioCSL).<sup>3</sup> This incident, which led to temporary nationwide suspension of paediatric influenza immunisation, resulted in a loss of confidence in influenza vaccines among consumers and immunisation providers and decreased influenza vaccine uptake.<sup>4 5</sup>

From 2014–2016 AusVaxSafety conducted influenza vaccine safety surveillance in 8,184 children aged 6 months–4 years.<sup>6 7</sup> A retrospective analysis comparing safety profiles of trivalent inactivated influenza vaccine (TIIV) and quadrivalent inactivated influenza vaccine (QIIV) brands in 2015 and 2016 demonstrated that concomitant vaccine administration in young children was associated with increased fever and medical attendance (MA) rates post-vaccination, although rates were low and within expected ranges.<sup>7</sup> Importantly, detailed follow-up data on the small number of children who

1  
2  
3 sought medical attention showed no serious or unexpected vaccine-associated adverse events  
4  
5 following immunisation (AEFI).  
6

7  
8 In 2017, AusVaxSafety surveillance expanded to include influenza vaccine recipients of all ages. Here  
9  
10 we provide an overview of AusVaxSafety's weekly surveillance and a detailed analysis of cumulative  
11  
12 (end of vaccine season) safety data by QIIV brand, age, pregnancy status and concomitant vaccine  
13  
14 receipt.  
15

## 16 17 **METHODS**

### 18 19 **AusVaxSafety active vaccine safety surveillance**

20  
21  
22 Surveillance included individuals aged  $\geq 6$  months who received a 2017 seasonal influenza vaccine  
23  
24 between 1 April–31 August 2017 at one of 194 participating immunisation providers across Australia,  
25  
26 including general practices, hospitals, community-based clinics and Aboriginal Medical Services. .  
27

28  
29 Annual influenza vaccination is recommended for all individuals aged 6 months and older who wish  
30  
31 to protect themselves from influenza, but it is funded (available for free) under the Australian  
32  
33 National Immunisation Program (NIP) for groups at increased risk of complications from influenza.  
34

35  
36 These include individuals aged 65 years and older; Aboriginal and Torres Strait Islander people aged  
37  
38 six months to four years and 15 years and older; pregnant women; and anyone six months and older  
39  
40 who has a medical condition (including heart or lung disease, asthma, chronic neurological  
41  
42 conditions, immune compromising conditions or other chronic illnesses such as diabetes).<sup>8</sup> In 2017,  
43  
44 one state (Western Australia) also funded influenza vaccine for all children aged six months to four  
45  
46 years.  
47

48  
49 Most individuals were enrolled using the opt-out, computer-based monitoring platform SmartVax,  
50  
51 which integrates with immunisation provider management software to issue automated surveys to  
52  
53 vaccine recipients or their caregivers via SMS, as previously described.<sup>9</sup> A minority of AusVaxSafety  
54  
55 sites (n=30) utilised one of two alternative computer-based monitoring platforms—Vaxtracker<sup>10</sup>  
56  
57  
58  
59  
60



1  
2  
3 (recipients aged 6 months–4 years only) or STARSS (Stimulated Telephone-Assisted Rapid Safety  
4 Surveillance)<sup>11</sup>—to solicit influenza vaccine adverse events following opt-in enrolment.  
5  
6

7  
8 Vaccinated individuals/caregivers received an SMS from their medical provider 3 days post-  
9 vaccination inquiring about AEFI (“We would like to know if there were any reactions to the vax.  
10 Please reply with JUST a Y or N.”). Those who responded “Y” or “N” were classified as participants,  
11 and those who responded “Y” were then asked whether or not the event was medically attended.  
12  
13 “Yes” responders were asked to detail the adverse event(s) and/or medical attention in a short  
14 online survey, which listed a range of symptoms and asked participants to tick all symptoms  
15 experienced. As children aged 6 months–8 years and immunocompromised individuals of any age  
16 are recommended to receive two vaccine doses at least four weeks apart when first immunised,  
17 some may have been represented by more than one record.  
18  
19  
20  
21  
22  
23  
24  
25

26  
27 Primary outcomes surveyed were reports of any event (yes or no), fever (solicited in the online  
28 survey), and MA (yes or no). Secondary outcomes (solicited in the online survey) were injection site  
29 (IS) pain, swelling and/or redness; tiredness/fatigue; headache; sleep pattern change; irritability;  
30 rash; vomiting; diarrhoea; rigors; non-responsiveness/loss-of-consciousness; and  
31 convulsions/seizures. Unsolicited symptoms were detailed by participants in free text.  
32  
33  
34  
35  
36  
37

38  
39 Detailed clinical data from MAs were sought using additional information from participants’  
40 immunisation providers and/or by a public health authority, who attempted to contact  
41 participants/caregivers to ascertain whether or not MAs were serious (as defined by the Australian  
42 Therapeutic Goods Administration (TGA)).<sup>12</sup>  
43  
44  
45  
46  
47

## 48 **Ethics**

49  
50 The AusVaxSafety surveillance system and its data monitoring platforms operate nationally under  
51 human research ethical approval obtained from the Sydney Children’s Hospital Network  
52  
53  
54  
55  
56  
57  
58  
59  
60

1  
2  
3 (HREC/16/SCHN/19) and the Royal Australian College of General Practitioners National Research and  
4  
5 Evaluation Ethics Committee (NREEC15-007).  
6

### 7 8 **Patient involvement**

9  
10 The AusVaxSafety surveillance system does not specifically recruit patients but does rely on  
11  
12 community participation. The majority of participants are included in the surveillance system  
13  
14 because their primary care provider or immunisation clinic has installed the SmartVax data  
15  
16 monitoring platform, which functions in conjunction with the clinic software. Where installed,  
17  
18 SmartVax automatically sends text messages to all patients who receive any vaccine to seek  
19  
20 information regarding any AEFI as a routine part of patient management and after-care. In this  
21  
22 study, we report only on patient responses regarding influenza vaccine. A small proportion of  
23  
24 participant data are provided to AusVaxSafety via the Vaxtracker or STARSS data monitoring  
25  
26 platforms which similarly survey individuals who have received an influenza vaccination from a  
27  
28 participating provider or clinic. The data monitoring platforms were piloted and developed with  
29  
30 feedback from users. The AusVaxSafety surveillance system Advisory Committee includes a  
31  
32 consumer/patient representative. Surveillance results are uploaded to the AusVaxSafety website  
33  
34 ([www.ausvaxsafety.org.au](http://www.ausvaxsafety.org.au)) weekly and available to the public.  
35  
36  
37  
38

### 39 **Near real-time reporting and analysis**

40  
41 De-identified records (including demographic, immunisation visit, and SMS/survey response data)  
42  
43 were uploaded to the computer-based monitoring systems and exported weekly to the  
44  
45 AusVaxSafety coordinating centre for aggregation and analysis. MA reports triggered clinical follow-  
46  
47 up by designated public health authorities each weekday. Weekly analysis of cumulative data  
48  
49 (received up to 5 days prior) for age- and pregnancy-specific AEFI rates and participant demographic  
50  
51 characteristics were reported in detail to the Australian Department of Health and summary results  
52  
53 published online each Friday ([www.ausvaxsafety.org.au](http://www.ausvaxsafety.org.au)) from week three of surveillance for the  
54  
55 duration of the surveillance period.  
56  
57  
58  
59  
60

### Weekly signal detection

Participant-reported rates of fever (for those aged 6 months–4 years) and MA (for all participants, grouped by age: 6 months–4 years, 5–64 years, and  $\geq 65$  years; and pregnant participants) as a surrogate for serious adverse events (SAE)<sup>7</sup> were considered the most objective outcome measures of vaccine safety and were monitored weekly using signal detection methods.

Fast initial response cumulative summation (FIR CUSUM) control charts monitored log-likelihood ratios of each event rate being at a maximum acceptable level versus expected level.<sup>13</sup> Expected and maximum acceptable rates were set based on syntheses of clinical trial data and previous surveillance results.<sup>6 7 10 14-16</sup> The expected MA rate was set at 1%, and the expected fever rate at 3%. Maximum acceptable rates were set at 3% and 10% for MA and fever, respectively. A safety signal is generated if the log-likelihood ratio (a measure of the degree to which the data are more consistent with an event rate equal to the maximum acceptable rate versus the expected rate) rises above a predetermined threshold. The threshold log-likelihood ratio was selected such that across 10,000 simulated vaccination seasons there would be  $\geq 80\%$  probability of signal generation within 3 weeks of commencement if the event rate is at the maximum acceptable level, and  $\leq 2\%$  probability of (false) signal generation over the entire season when the event rate is at the expected level.

Bayesian analysis was also performed weekly for robust, optimal estimation of the 95% credibility interval (CI) for true cumulative event rates. Beta distributions with means derived from 2016 surveillance data and literature review (MA: 1% for participants aged 6 months–4 years; 0.3% for participants aged 5–64 years and  $\geq 65$  years; 1% for pregnant participants; and fever: 3% for participants aged 6 months–4 years)<sup>7</sup> were used as priors at the start of the 2017 season. Priors were updated with each week's observed data and credibility intervals from the posterior beta distribution were reported weekly.

### End-of-surveillance cumulative analysis

1  
2  
3 Cumulative data were reported by epidemiological week and demographic information including age  
4 (6 months–4 years, 5–14 years, 15–39 years, 40–64 years, and  $\geq 65$  years), sex, pregnancy status  
5 (available for SmartVax participants only), Aboriginal and/or Torres Strait Islander (hereafter  
6 referred to as Indigenous) status, and concomitant vaccine administration (defined as any additional  
7 vaccine(s) received at the same visit as influenza vaccine).  
8  
9  
10  
11  
12

13  
14 For any adverse event, fever, and MA, rates were calculated for each age group and pairwise  
15 proportion tests with Holm adjustment for multiple comparisons were performed to compare AEFI  
16 rates between pairs of age groups using R version 3.4.2 (R Foundation for Statistical Computing,  
17 Vienna, Austria). AEFI rates in pregnant women were compared to those of non-pregnant female  
18 SmartVax participants of the same age range (15–49 years) using Pearson's chi-square test in Stata  
19 version 14.2 (Statacorp LLC, College Station, TX, USA). Rates of primary and secondary outcomes  
20 were calculated by brand, and secondary outcomes were calculated for each age group and  
21 pregnant women.  
22  
23  
24  
25  
26  
27  
28  
29  
30

31 Primary outcome AEFI rates were also calculated for age groups and pregnant women by vaccine  
32 brand and concomitant vaccine receipt (yes or no). The relative risk of each adverse event was  
33 compared for those receiving influenza vaccine plus any concomitant vaccine(s) versus influenza  
34 vaccine alone, and for those receiving FluQuadri versus Fluarix Tetra, using a generalised linear model  
35 with a log link and binomial distribution in Stata version 14.2.  
36  
37  
38  
39  
40  
41  
42

## 43 **RESULTS**

### 44 **Weekly signal detection throughout 2017**

45  
46 No safety signals were detected by the FIR CUSUM method (eFigure 1). Weekly and cumulative  
47 Bayesian rates of fever and MA remained well below their respective maximum acceptable rates  
48 over the surveillance period: the cumulative (end-of-season) fever rate in children aged 6 months–4  
49 years was 2.3% (95% posterior CI: 2.0, 2.7), while cumulative MA rates were 1.0% (95% CI: 0.73,  
50  
51  
52  
53  
54  
55  
56  
57  
58  
59  
60

1  
2  
3 1.21) in children aged 6 months–4 years, 0.5% (95% CI: 0.41, 0.55) in participants aged 5–64 years,  
4  
5 0.3% (95% CI: 0.22, 0.34) in participants aged ≥65 years and 0.5% (95% CI: 0.26, 0.87) in pregnant  
6  
7 women. For those MAs that were followed up, none of these events was categorised as serious.  
8  
9

### 10 **End-of-surveillance analysis**

11  
12 Over the surveillance period, 73,892 of 102,911 enrollees (71.8%) responded to the post-vaccination  
13  
14 SMS; over 95% of participants with response time available (N=71,093) responded on the same day  
15  
16 of SMS receipt. Participants received one of four available QIVs: Fluarix Tetra (GlaxoSmithKline;  
17  
18 45.3%), FluQuadri (Sanofi-Aventis; 42.3%), FluQuadri Junior (Sanofi-Aventis; 5.6%), or Afluria Quad  
19  
20 (Seqirus; 6.8%); less than 1.0% received a vaccine whose brand could not be determined. Half of all  
21  
22 vaccines were administered within 5 weeks of starting surveillance, with older participants (≥65  
23  
24 years) receiving vaccines earlier compared to young children (6 months–4 years old) and pregnant  
25  
26 women (Figure 1).  
27  
28

29  
30 Among all participants, 58.1% were female and the median age was 57 years (range: 6 months–102  
31  
32 years). Two percent (1,156/58,145 with data available) were Indigenous, which is representative of  
33  
34 the Australian national Aboriginal and/or Torres Strait Islander population (2.8%) (Table 1). Among  
35  
36 female participants aged 15–49 years for whom pregnancy status was available (98.6%), 15.2%  
37  
38 (2,018/13,242) were pregnant. Individuals aged ≥65 years represented the largest proportion of  
39  
40 participants (38.1%; 33.6% aged 65–79 years and 4.5% aged ≥80 years). Approximately 14% of  
41  
42 participants (10,428/73,892) received a concomitant vaccine, of which 86.6% received only one. The  
43  
44 most commonly received concomitant vaccines are listed in Table 1.  
45  
46

47  
48 Compared to other age groups, children aged 6 months–4 years were reported as having  
49  
50 significantly higher rates of any adverse event, while participants aged ≥65 years reported events  
51  
52 less often (Table 2). Pregnant women reported significantly lower rates of any adverse event  
53  
54 compared to non-pregnant women of the same age range (15–49 years; p=.019, data not shown).  
55  
56  
57  
58  
59  
60

1  
2  
3 Rates of more subjective secondary outcomes surveyed showed similar trends across age groups and  
4  
5 by pregnancy status (eTable 1).  
6

7  
8 Participants who received concomitant vaccine(s) had an elevated risk of reporting any adverse  
9  
10 event and fever compared to participants who received influenza vaccine alone (Table 3). This  
11  
12 pattern was seen for all age groups, with the exception of fever in participants aged 15–39 years and  
13  
14 pregnant women. Participants aged  $\geq 40$  years who received concomitant vaccine(s) reported MA at  
15  
16 a significantly higher rate than those who received only an influenza vaccine.  
17

18  
19 Brand-specific AEFI rates were similar, particularly for FluQuadri and Fluarix Tetra, the brands  
20  
21 administered to the majority of participants (Table 4, eTable 2).  
22

## 23 24 **DISCUSSION**

25  
26 AusVaxSafety surveillance utilised almost 74,000 actively solicited participant-reported outcomes to  
27  
28 demonstrate that the four brands of QIV used in Australia in 2017 were safe and had low and  
29  
30 comparable adverse event rates within expected ranges for all age groups and pregnant women.<sup>10 14-</sup>

31  
32 <sup>16</sup> This novel system provided reassuring, locally-derived feedback on vaccine safety in near real time  
33  
34 to the public and immunisation providers as influenza vaccination was rolled out across Australia.<sup>17</sup>

35  
36  
37 Consistent with data published from vaccine clinical trials, the most common participant-reported  
38  
39 event following influenza immunisation was IS pain (1.7% overall). IS pain was also commonly  
40  
41 reported in clinical trials, but at higher rates than those demonstrated in this post-marketing  
42  
43 surveillance. Clinical trials in children reported IS pain in approximately two-thirds of those aged 3–  
44  
45 17 years<sup>18</sup> with similarly high rates (up to 72.4%) in adults aged 18–60 years.<sup>19 20</sup> This difference is  
46  
47 likely due to more active solicitation of AEFI in clinical trials via daily diary cards, resulting in more  
48  
49 complete reporting. Also, as AusVaxSafety participants may be informed of expected common  
50  
51 vaccine reactions by their clinicians, these symptoms may be less likely to be reported. By  
52  
53 comparison, data from both this post-marketing surveillance and clinical trials confirmed low rates  
54  
55  
56  
57  
58  
59  
60

1  
2  
3 of SAEs (0.4% for AusVaxSafety compared with 0.0–2.3% for the clinical trials), despite differences in  
4 SAE definitions. Equally reassuring, both IS pain rates and SAEs among pregnant women in our  
5 surveillance were low and consistent with rates reported among participants of all ages.  
6  
7

8  
9  
10 Adverse event rates were similar for Fluarix Tetra (GlaxoSmithKline) and FluQuadri (Sanofi-Aventis),  
11 the two most utilised QIIVs in Australia in 2017. Though small and variable differences in AEFI rates  
12 between brands were reported, this is likely attributable to factors such as age and uncontrolled  
13 confounding, and is not of clinical significance. Ongoing brand-specific surveillance will provide  
14 valuable safety data in future years, especially as two new, more immunogenic vaccine types—the  
15 high dose TIIV (Fluzone High Dose, Sanofi-Aventis) and the MF-59 adjuvanted influenza vaccine  
16 (Fluad, Seqirus)—are being included on the Australian NIP for adults aged  $\geq 65$  years from 2018.<sup>21</sup>  
17  
18  
19  
20  
21  
22  
23

24  
25 We previously observed that AusVaxSafety participants aged 6 months–4 years who received  
26 influenza vaccine and another vaccine concomitantly (in particular diphtheria-tetanus-acellular  
27 pertussis-inactivated poliovirus (DTPa-IPV) or meningococcal B vaccines) had significantly increased  
28 AEFI rates (especially fever) compared to those receiving influenza vaccine alone.<sup>6,7</sup> The present  
29 analysis showed that AEFI were more common with concomitant vaccination among participants of  
30 all ages, including increased fever rates in both children and older adults and an increased risk of MA  
31 among those aged  $\geq 40$  years. The most commonly received concomitant vaccines were 23-valent  
32 pneumococcal vaccine, reduced antigen pertussis-containing vaccine (dTpa) and live attenuated  
33 zoster vaccine, which are reactogenic when administered individually.<sup>22–28</sup> It has been shown that  
34 concomitant receipt of influenza and 13-valent pneumococcal vaccines results in increased local and  
35 systemic events, including fever among children<sup>29–31</sup>, while such differences in AEFI rates were not  
36 observed with concomitant receipt of influenza and pertussis or zoster vaccines.<sup>32–35</sup> Importantly, the  
37 increased risks of AEFI occurring with concomitant vaccination reported by AusVaxSafety—including  
38 those requiring MA—were low and likely not of clinical importance. This information may help  
39 providers to reassure patients who are receiving more than one vaccine at the same time that  
40  
41  
42  
43  
44  
45  
46  
47  
48  
49  
50  
51  
52  
53  
54  
55  
56  
57  
58  
59  
60

1  
2  
3 although they may have a slightly higher rate of side effects, the absolute rate is low overall. As  
4  
5 more vaccines become available, assessment of adverse events associated with concomitant  
6  
7 vaccination using surveillance like AusVaxSafety has the potential to contribute valuable detail to  
8  
9 post-marketing pharmacovigilance.  
10

11  
12 To the best of our knowledge, AusVaxSafety is a unique post-marketing vaccine safety surveillance  
13  
14 system in its high level of automation, patient and provider engagement and ability to provide data  
15  
16 on vaccine brand-specific AEFI rates in near real time. However, since the EMA recommendation to  
17  
18 provide annual brand-specific safety data, there has been an increase in pilot and feasibility studies  
19  
20 of influenza vaccine safety surveillance methods and systems.<sup>36-40</sup> Several are enhanced passive  
21  
22 surveillance systems relying on patients returning adverse events reports via cards or telephone.<sup>36 38</sup>  
23

24  
25 Such systems are limited by potential under-reporting of events and are likely slower and more  
26  
27 resource-intensive as staff must enter AEFI details or conduct interviews. The Canadian National  
28  
29 Vaccine Safety (CANVAS) Network has conducted a small pilot of a mobile phone app for reporting  
30  
31 adverse events.<sup>40</sup> Eighty-six percent of those replying to questions about the usability of an app for  
32  
33 reporting AEFI said they would prefer an app to visiting a website. Nevertheless, investigators  
34  
35 acknowledged that the app was limited by download requirements and low survey completion rates.  
36

37  
38 The US Centers for Disease Control and Prevention's Vaccine Safety Datalink (VSD), which utilises  
39  
40 large linked databases from health care organisations, conducts Rapid Cycle Analysis (RCA) to report  
41  
42 AEFI rates in near real time but may be limited by delays between AEFI occurrence and electronic  
43  
44 reporting to administrative datasets. VSD's surveillance compares outcomes of interest in those who  
45  
46 received the vaccine against the same outcomes experienced by a group of individuals who did not  
47  
48 receive the vaccine (or in a control period for the vaccine recipient for self-controlled case series).<sup>41</sup>  
49

50  
51 <sup>42</sup> While AusVaxSafety does not currently monitor some of the more severe adverse events that the  
52  
53 VSD's RCA may detect (particularly those occurring more than 3 days following vaccination),  
54  
55 AusVaxSafety's strength comes from its ability to quickly estimate the number of vaccine recipients  
56  
57 who have (or have not) experienced an AEFI without relying on complex analytical methods.  
58



1  
2  
3 There are several limitations of AusVaxSafety surveillance and the analysis in this report. Firstly, self-  
4 or parent/carer-reports of outcomes gathered through participant-based feedback may be less  
5 accurate for common and expected reactions than those solicited from clinical trial participants or  
6 those detected by systems like the VSD. Secondly, though we have attempted to adjust for potential  
7 biases by reporting the more objective outcomes of MA and fever, it should be noted that  
8 participant-reported fever is subjective and has not been confirmed. Also, should a very serious  
9 event, such as death, occur post-immunisation, an individual may not be capable of participating in  
10 AusVaxSafety surveillance; the system may therefore not identify the most serious adverse events.  
11 Thirdly, not all adverse events are vaccine-attributable, and AEFI rates may be affected by other  
12 illnesses with similar outcomes, e.g. fever from intercurrent viral illness. Finally, in this report, data  
13 did not allow for comparisons of the reactogenicity of each non-influenza vaccine administered  
14 alone, and therefore conclusions made about increased adverse event rates associated with  
15 concomitant vaccination must be tempered. As AusVaxSafety expands to include safety surveillance  
16 for more vaccines, the system's capacity to make such comparisons and provide data on the  
17 reactogenicity of more and varied vaccines will be enhanced.

18  
19  
20 In its requirement that annual enhanced post-authorisation influenza vaccine safety monitoring  
21 occur for all seasonal influenza vaccines, the EMA stated a preference for active surveillance.<sup>2</sup> Data  
22 in this report and for other vaccines in the AusVaxSafety system (including pertussis, human  
23 papillomavirus (HPV) and herpes zoster vaccines<sup>17</sup>) from hundreds of thousands of vaccinated  
24 participants since 2014 demonstrate the value of active vaccine safety surveillance systems. Age-  
25 and brand-specific AEFI rates are available within weeks of the commencement of each year's  
26 seasonal influenza immunisation program, which ensure early detection of potential safety signals.  
27 This includes 2018 southern hemisphere seasonal influenza vaccines, for which data from more than  
28 140,000 influenza vaccine recipients vaccinated between April and June 2018 demonstrate no safety  
29 concerns (data not shown, but available in summary form at [www.ausvaxsafety.org.au](http://www.ausvaxsafety.org.au)).

1  
2  
3 Australia also has a comprehensive national passive vaccine safety surveillance system.<sup>43</sup> However,  
4 all passive or spontaneous reporting systems have inherent limitations, including incomplete and  
5 under-reporting, stimulated reporting, and limited data on vaccine brands. Importantly, with passive  
6 systems, it is often difficult to determine AEFI rates due to lack of denominator data on vaccines  
7 administered. In Australia, these limitations have especially affected passive influenza vaccine safety  
8 surveillance, , and have led to previous difficulty in interpreting early or potential vaccine safety  
9 signals.<sup>44</sup>In this context, AusVaxSafety provides important data to ensure confidence in the safety of  
10 vaccines in use in large populations in near-real time.  
11  
12  
13  
14  
15  
16  
17  
18

## 19 20 **CONCLUSIONS**

21  
22  
23 Approximately 74,000 influenza vaccine recipients reported low adverse event rates following  
24 immunisation with the four brands of QIIV used in Australia in 2017. Concomitant vaccination was  
25 associated with an increased AEFI risk, but rates were still low and within expected ranges. Our novel  
26 participant-based post-marketing vaccine safety surveillance system is a valuable tool for monitoring  
27 immunisation, especially for annually changing influenza vaccines.  
28  
29  
30  
31  
32  
33

## 34 **ACKNOWLEDGEMENTS**

35  
36  
37 We would like to thank the AusVaxSafety Steering Committee members for their contribution to  
38 oversight of the 2017 surveillance efforts. We would also like to express our gratitude to the staff at  
39 participating hospitals, clinics, general practices and jurisdictional health departments, as well as the  
40 vaccine recipients who participated in this surveillance. AusVaxSafety would like to thank the three  
41 contributing data monitoring platforms: Vaxtracker, STARSS, and in particular SmartVax, which  
42 provided the majority of the 2017 influenza vaccine surveillance data, and particularly acknowledge  
43 the contribution of and technological expertise of Ian Peters, co-developer of SmartVax. Finally, we  
44 would like to acknowledge Chloe Damon for her excellent work coordinating the AusVaxSafety  
45 active surveillance system.  
46  
47  
48  
49  
50  
51  
52  
53  
54  
55  
56  
57  
58  
59  
60

**Contributors:**

AP, CG, HQ and KM made substantial contributions to the conception or design of the manuscript. AP and CG were responsible for drafting the manuscript and conducting all data analyses, with the exception of signal detection analyses, which were performed by PF. TS, PJ and PF were responsible for the conceptualisation and execution of the weekly safety signal detection analyses. AL, as co-developer of the SmartVax system, served as the system operator and advisor regarding SmartVax data. PC served as the system operator and advisor regarding Vaxtracker data. PC, AL, CB, MG, TS and KM were integral to the design and development of the AusVaxSafety vaccine safety surveillance system and served as key vaccine safety experts. All authors made substantial contributions to the analysis and interpretation of data for the work and revised the manuscript critically for important intellectual content. All authors had final approval of the version to be published and agreed to be accountable for all aspects of the work in ensuring that questions related to the accuracy or integrity of any part of the work are appropriately investigated and resolved.

This manuscript was written on behalf of the AusVaxSafety Expert Leadership Group: Jim Buttery, Nigel Crawford, David Durrheim, Paul Effler and Nicholas Wood.

**Data sharing statement:**

AusVaxSafety compiles ongoing, de-identified surveillance data of patient-reported adverse events for specific vaccines as contracted by the Australian Government Department of Health. Summarised results are publicly available on the AusVaxSafety website ([www.ausvaxsafety.org.au](http://www.ausvaxsafety.org.au)) but AusVaxSafety datasets are not publicly available.

**Figure legends:**

1  
2  
3 **Figure 1:** Counts of enrollees and participants by epidemiological week and age group or pregnancy  
4 status (A: 6 months-4 years; B: 5-64 years;  $\geq 65$  years; D: Pregnant). Each bar displays the number of  
5 participants (dark grey) out of the total number of enrollees (light grey) for each week.  
6  
7

8 **eFigure 1:** Fast initial response cumulative sum (FIR CUSUM) safety signal detection charts for  
9 medical attendance during the surveillance period, by age group (A: 6 months-4 years; B: 5-64 years;  
10 C:  $\geq 65$  years) and pregnancy status (D). X axes demonstrate surveillance week. Surveillance week 1  
11 started on 1 April 2017 and ended on 9 April 2017, for a total of 9 days. Surveillance week 22 started  
12 on 28 August 2017 and ended on 31 August 2017, for a total of 4 days. Red, solid lines plot the  
13 CUSUM for medical attendances reported by participants of each group over the surveillance period,  
14 with the control thresholds appearing as dotted lines. A safety signal is generated if the red, solid  
15 lines cross the dotted threshold line.  
16  
17  
18  
19  
20  
21  
22  
23  
24  
25  
26  
27  
28  
29  
30  
31  
32  
33  
34  
35  
36  
37  
38  
39  
40  
41  
42  
43  
44  
45  
46  
47  
48  
49  
50  
51  
52  
53  
54  
55  
56  
57  
58  
59  
60

## REFERENCES

1. Palache A, Abelin A, Hollingsworth R, et al. Survey of distribution of seasonal influenza vaccine doses in 201 countries (2004-2015): The 2003 World Health Assembly resolution on seasonal influenza vaccination coverage and the 2009 influenza pandemic have had very little impact on improving influenza control and pandemic preparedness. *Vaccine* 2017;**35**:4681–86.
2. European Medicines Agency. Guideline on influenza vaccines non-clinical and clinical module. London, UK: European Medicines Agency, 2016.
3. Armstrong P, Dowse G, Effler P, et al. Epidemiological study of severe febrile reactions in young children in Western Australia caused by a 2010 trivalent inactivated influenza vaccine. *BMJ Open* 2011;**1**.
4. Blyth C, Richmond P, Jacoby P, et al. The impact of pandemic A(H1N1)pdm09 influenza and vaccine-associated adverse events on parental attitudes and influenza vaccine uptake in young children. *Vaccine* 2014;**32**:4075–81.
5. The Royal Children's Hospital Melbourne. Vaccination: perspectives of Australian parents. The Royal Children's Hospital National Child Health Poll 2017.
6. Pillsbury A, Cashman P, Leeb A, et al. Real-time safety surveillance of seasonal influenza vaccines in children, Australia, 2015. *Euro Surveill* 2015;**20**.
7. Pillsbury A, Quinn H, Cashman P, et al. Active SMS-based influenza vaccine safety surveillance in Australian children. *Vaccine* 2017;**35**:7101–06.
8. Australian Technical Advisory Group on Immunisation (ATAGI). The Australian Immunisation Handbook. 10th ed (2017 update). Canberra, ACT: The Australian Government Department of Health and Ageing, 2017.
9. Leeb A, Regan A, Peters I, et al. Using automated text messages to monitor adverse events following immunisation in general practice. *Med J Aust* 2014;**200**:416–18.
10. Cashman P, Moberley S, Dalton C, et al. Vaxtracker: Active on-line surveillance for adverse events following inactivated influenza vaccine in children. *Vaccine* 2014;**32**:5503–08.
11. About STARSS Adelaide: The University of Adelaide, 2015. <http://www.adelaide.edu.au/trials/starss/about-starss> (accessed May 9, 2017).
12. Australian Government Department of Health, Therapeutic Goods Administration (TGA). Pharmacovigilance responsibilities of medicine sponsors: Australian recommendations and requirements. <https://www.tga.gov.au/publication/pharmacovigilance-responsibilities-medicine-sponsors> (accessed 27 June 2018).
13. Grigg OA, Farewell VT, Spiegelhalter DJ. Use of risk-adjusted CUSUM and RSPRT charts for monitoring in medical contexts. *Stat Methods Med Res* 2003;**12**:147–70.
14. Blyth C, Markus T, Effler P, et al. Ensuring safety of the 2011 trivalent influenza vaccine young children. *Med J Aust* 2011;**195**:52.
15. Wood N, Blyth C, Willis G, et al. The safety of seasonal influenza vaccines in Australian children in 2013. *Med J Aust* 2014;**201**:596–600.
16. Li-Kim-Moy J, Yin J, Rashid H, et al. Systematic review of fever, febrile convulsions and serious adverse events following administration of inactivated trivalent influenza vaccines in children. *Euro Surveill* 2015;**20**.
17. National Centre for Immunisation Research and Surveillance (NCIRS). AusVaxSafety, Sydney: NCIRS; 2017. <http://ausvaxsafety.org.au> (accessed 16 January 2018).
18. Langley JM, Wang L, Aggarwal N, et al. Immunogenicity and reactogenicity of an inactivated quadrivalent influenza vaccine administered intramuscularly to children 6 to 35 months of age in 2012–2013: A randomized, double-blind, controlled, multicenter, multicountry, clinical trial. *J Pediatric Infect Dis Soc* 2015;**4**:242–51.
19. Beran J, Peeters M, Dewe W, et al. Immunogenicity and safety of quadrivalent versus trivalent inactivated influenza vaccine: a randomized, controlled trial in adults. *BMC Infect Dis* 2013;**13**.

- 1
- 2
- 3 20. Pepin S, Donazzolo Y, Jambrecina A, et al. Safety and immunogenicity of a quadrivalent
- 4 inactivated influenza vaccine in adults. *Vaccine* 2013;**31**:5572–78.
- 5 21. Australian Government Department of Health and Ageing. *Ground-breaking flu vaccines to*
- 6 *protect millions of Aussies*. Canberra: Australian Government Department of Health and
- 7 Ageing, 2018.
- 8 22. Hammitt LL, Bulkow LR, Singleton RJ, et al. Repeat revaccination with 23-valent pneumococcal
- 9 polysaccharide vaccine among adults aged 55-74 years living in Alaska: No evidence of
- 10 hyporesponsiveness. *Vaccine* 2011;**29**:2287–95.
- 11 23. Musher DM, Manoff SB, McFetridge RD, et al. Antibody persistence ten years after first and
- 12 second doses of 23-valent pneumococcal polysaccharide vaccine, and immunogenicity and
- 13 safety of second and third doses in older adults. *Hum Vaccin* 2011;**7**:919–28.
- 14 24. Booy R, Van der Meeren O, Ng SP, et al. A decennial booster dose of reduced antigen content
- 15 diphtheria, tetanus, acellular pertussis vaccine (Boostrix™) is immunogenic and well
- 16 tolerated in adults. *Vaccine* 2010;**29**:45–50.
- 17 25. Halperin SA, McNeil S, Langley J, et al. Tolerability and antibody response in adolescents and
- 18 adults revaccinated with tetanus toxoid, reduced diphtheria toxoid, and acellular pertussis
- 19 vaccine adsorbed (Tdap) 4-5 years after a previous dose. *Vaccine* 2011;**29**:8459–65.
- 20 26. Halperin SA, Sweet L, Baxendale D, et al. How soon after a prior tetanus-diphtheria vaccination
- 21 can one give adult formulation tetanus-diphtheria-acellular pertussis vaccine? *Pediatr Infect*
- 22 *Dis J* 2006;**25**:195–200.
- 23 27. Talbot EA, Brown KH, Kirkland KB, et al. The safety of immunizing with tetanus-diphtheria-
- 24 acellular pertussis vaccine (Tdap) less than 2 years following previous tetanus vaccination:
- 25 Experience during a mass vaccination campaign of healthcare personnel during a respiratory
- 26 illness outbreak. *Vaccine* 2010;**28**:8001–7.
- 27 28. Oxman MN, Levin MJ, Johnson GR, et al. A vaccine to prevent herpes zoster and postherpetic
- 28 neuralgia in older adults. *NEJM* 2005;**352**:2271–2284.
- 29 29. Frenck RW, Gurtman A, Rubino J, et al. Randomized, controlled trial of a 13-valent pneumococcal
- 30 conjugate vaccine administered concomitantly with influenza vaccine in healthy adults. *Clin*
- 31 *Vaccine Immunol* 2012;**19**:1296–303.
- 32 30. Schwarz TF, Flamaing J, Rumke HC, et al. A randomized, double-blind trial to evaluate
- 33 immunogenicity and safety of 13-valent pneumococcal conjugate vaccine given
- 34 concomitantly with trivalent influenza vaccine in adults aged ≥65 years. *Vaccine*
- 35 2011;**29**:5195–202.
- 36 31. Van Buynder PG, Frosst G, Van Buynder JL, et al. Increased reactions to pediatric influenza
- 37 vaccination following concomitant pneumococcal vaccination. *Influenza and other*
- 38 *respiratory viruses* 2012;**7**(2):184-90.
- 39 32. Sukumaran L, McCarthy NL, Kharbanda EO, et al. Safety of Tetanus Toxoid, Reduced Diphtheria
- 40 Toxoid, and Acellular Pertussis and Influenza Vaccinations in Pregnancy. *Obstet Gynecol*
- 41 2015;**126**:1069–74.
- 42 33. Levin MJ, Buchwald UK, Gardner J, et al. Immunogenicity and safety of zoster vaccine live
- 43 administered with quadrivalent influenza virus vaccine. *Vaccine* 2018;**36**.
- 44 34. Kerzner B, Murray AV, Cheng E, et al. Safety and immunogenicity profile of the concomitant
- 45 administration of ZOSTAVAX and inactivated influenza vaccine in adults age 50 and older. *J*
- 46 *Am Geriatr Soc* 2007;**55**:1499.
- 47 35. Weston WM, Chandrashekar V, Friedland LR, et al. Safety and immunogenicity of a tetanus
- 48 toxoid, reduced diphtheria toxoid, and acellular pertussis vaccine when co-administered with
- 49 influenza vaccine in adults. *Hum Vaccin* 2009;**5**:858–68.
- 50 36. de Lusignan S, Dos Santos G, Correa A, et al. Post-authorisation passive enhanced safety
- 51 surveillance of seasonal influenza vaccines: protocol of a pilot study in England. *BMJ Open*
- 52 2017;**7**.
- 53
- 54
- 55
- 56
- 57
- 58
- 59
- 60

- 1  
2  
3 37. Stockwell MS, Marchant CD, Wodi AP, et al. A multi-site feasibility study to assess fever and  
4 wheezing in children after influenza vaccines using text messaging. *Vaccine* 2017;**35**:6941–  
5 48.
- 6 38. Bricout H, Chabanon AL, Souverain A, et al. Passive enhanced safety surveillance for Vaxigrip and  
7 Intanza 15 mg in the United Kingdom and Finland during the northern hemisphere influenza  
8 season 2015/16. *Euro Surveill* 2017;**22**.
- 9 39. Stuurman AL, Verstraeten T, De Schryver A. Rapid assessment of the reactogenicity of a 2016-  
10 2017 seasonal influenza vaccine: results from a feasibility study. *Expert Rev Vaccines*  
11 2017;**16**:187–91.
- 12 40. Wilson K, Atkinson KM, Westeinde J, et al. An evaluation of the feasibility and usability of a proof  
13 of concept mobile app for adverse event reporting post influenza vaccination. *Hum Vaccin*  
14 *Immunother* 2016;**12**:1738–48.
- 15 41. McNeil MM, Gee J, Weintraub E, et al. The Vaccine Safety Datalink: successes and challenges  
16 monitoring vaccine safety. *Vaccine* 2014;**32**:5390–98.
- 17 42. Greene SK, Kulldorff M, Lewis EM, et al. Near real-time surveillance for influenza vaccine safety:  
18 proof-of-concept in the Vaccine Safety Datalink Project *Am J Epidemiol* 2010;**171**:177–88.
- 19  
20 43. Dey A, Wang H, Quinn H, et al. Annual report: surveillance of adverse events following  
21 immunisation in Australia, 2015. *Commun Dis Intell* 2017;**41**:E264–E278.
- 22  
23 44. Clothier HJ, Crawford N, Russell MA, et al. Allergic adverse events following 2015 seasonal  
24 influenza vaccine, Victoria, Australia. *Euro Surveill* 2017;**22**.
- 25  
26  
27  
28  
29  
30  
31  
32  
33  
34  
35  
36  
37  
38  
39  
40  
41  
42  
43  
44  
45  
46  
47  
48  
49  
50  
51  
52  
53  
54  
55  
56  
57  
58  
59  
60

**Table 1. Descriptive variables of 73,892 participants in AusVaxSafety's 2017 influenza vaccine safety surveillance**

| Variable                                                       | Description                                | n (%)         |
|----------------------------------------------------------------|--------------------------------------------|---------------|
| Sex <sup>a</sup>                                               | Male                                       | 30,968 (41.9) |
|                                                                | Female                                     | 42,869 (58.1) |
| Indigenous status <sup>b</sup>                                 | Aboriginal                                 | 1,000 (1.7)   |
|                                                                | Torres Strait Islander                     | 32 (0.1)      |
|                                                                | Both                                       | 124 (0.2)     |
|                                                                | Total                                      | 1,156 (2.0)   |
| Pregnant <sup>c</sup>                                          | 2,018 (2.8)                                |               |
| Age median (IQR; range)                                        | 57 years (31–69 years; 6 months–102 years) |               |
| Age group                                                      | 6 months–4 years                           | 6,180 (8.4)   |
|                                                                | 5–14 years                                 | 4,415 (6.0)   |
|                                                                | 15–39 years                                | 13,434 (18.2) |
|                                                                | 40–64 years                                | 21,709 (29.4) |
|                                                                | ≥65 years                                  | 28,154 (38.1) |
| Number of participants receiving concomitant vaccine(s)        | 10,428 (14.1)                              |               |
| <i>Most common concomitant vaccines by group<sup>d,e</sup></i> |                                            |               |
| Overall (N = 10,428)                                           | 23vPPV                                     | 2,756 (26.4%) |
|                                                                | dTpa /dTpa-IPV                             | 2,504 (24.0%) |
|                                                                | Zoster                                     | 1,708 (16.4%) |
| 6 months–4 years (N = 1,295)                                   | DTPa-IPV                                   | 268 (20.7%)   |
|                                                                | HibMenCCV + MMR                            | 235 (18.1%)   |
|                                                                | MenBV                                      | 206 (15.9%)   |
|                                                                | DTPa + MMRV                                | 205 (15.8%)   |
| 5–14 years (N = 295)                                           | HPV                                        | 46 (15.6%)    |
|                                                                | Typhoid + Hepatitis A                      | 43 (14.6%)    |
|                                                                | Hepatitis A                                | 39 (13.2%)    |
|                                                                | MenBV                                      | 34 (11.5%)    |
| 15–39 years (N = 2,612)                                        | dTpa /dTpa-IPV                             | 1,743 (66.7%) |
|                                                                | Typhoid-Hepatitis A                        | 94 (3.6%)     |
|                                                                | Hepatitis A                                | 85 (3.3%)     |
| 40–64 years (N = 1,516)                                        | dTpa /dTpa-IPV                             | 534 (35.2%)   |
|                                                                | 23vPPV                                     | 311 (20.5%)   |
|                                                                | Typhoid                                    | 87 (5.7%)     |
| ≥65 years (N = 4,710)                                          | 23vPPV                                     | 2,403 (51.0%) |
|                                                                | Zoster                                     | 1,699 (36.1%) |
|                                                                | dTpa /dTpa-IPV                             | 220 (4.7%)    |
| Pregnant <sup>f</sup> (N = 634)                                | dTpa /dTpa-IPV                             | 633 (99.8%)   |
|                                                                | dTpa /dTpa-IPV + Hepatitis B               | 1 (0.2%)      |

<sup>a</sup> Sex available for N = 73,837 participants.

<sup>b</sup> Indigenous status available for N = 58,145 participants.

<sup>c</sup> Pregnancy status available for N = 72,951 participants (SmartVax only).

<sup>d</sup> The percentages listed under "concomitant vaccines" are the percentage of all concomitant vaccine(s) administered per group.



1  
2  
3 <sup>e</sup> + indicates two separate vaccines administered concomitantly.

4 <sup>f</sup> Pregnant participants are also included in their respective age categories (age range: 15–49 years).

5 Abbreviations: IQR: interquartile range; MMR: measles mumps rubella; 23vPPV: 23-valent pneumococcal  
6 polysaccharide vaccine. DTPa: Diphtheria tetanus acellular pertussis (for children aged <10 years); DTPa-IPV:  
7 DTPa-inactivated polio vaccine (for children aged <10 years); dTpa: diphtheria tetanus acellular pertussis (for  
8 individuals aged ≥10 years); dTpa-IPV: dTpa-inactivated polio vaccine (for individuals aged ≥10 years);  
9 HibMenC: *Haemophilus influenzae* type B meningococcal C conjugate vaccine; MenBV: meningococcal B  
10 vaccine  
11  
12  
13  
14  
15  
16  
17  
18  
19  
20  
21  
22  
23  
24  
25  
26  
27  
28  
29  
30  
31  
32  
33  
34  
35  
36  
37  
38  
39  
40  
41  
42  
43  
44  
45  
46  
47  
48  
49  
50  
51  
52  
53  
54  
55  
56  
57  
58  
59  
60

For peer review only

**Table 2. Adverse event rates for influenza vaccine, by age group and pregnancy status**

| Type of Adverse Event <sup>a</sup>    | Group [n/N (%)]    |                    |                     |                       |                       |                       |                       |
|---------------------------------------|--------------------|--------------------|---------------------|-----------------------|-----------------------|-----------------------|-----------------------|
|                                       | 6 months–4 years   | 5–14 years         | 15–39 years         | 40–64 years           | ≥65 years             | Pregnant <sup>c</sup> | Total                 |
| <i>Any adverse event<sup>b</sup></i>  | 522/6,180<br>(8.4) | 295/4,415<br>(6.7) | 836/13,434<br>(6.2) | 1,533/21,709<br>(7.1) | 1,695/28,154<br>(6.0) | 118/2,018<br>(5.8)    | 4,881/73,892<br>(6.6) |
| <i>Fever<sup>b</sup></i>              | 140/5,979<br>(2.3) | 54/4,266<br>(1.3)  | 121/13,020<br>(0.9) | 190/20,953<br>(0.9)   | 209/27,222<br>(0.8)   | 20/1,963<br>(1.0)     | 714/71,440<br>(1.0)   |
| <i>Medical attendance<sup>b</sup></i> | 59/6,180<br>(1.0)  | 21/4,415<br>(0.5)  | 75/13,434<br>(0.6)  | 94/21,709<br>(0.4)    | 77/28,154<br>(0.3)    | 10/2,018<br>(0.5)     | 326/73,892<br>(0.4)   |

<sup>a</sup> Denominators differ between any adverse event/medical attendance and fever because reports of fever are solicited in an online survey following the initial SMS regarding an AEFI, and not all participants complete the survey.

<sup>b</sup> p<.001 for participants aged 6 months–4 years compared to all other age groups.

<sup>c</sup> Pregnant participants are also included in their respective age categories (age range: 15–49 years). They are not compared to another group in this table.

**Table 3. Adverse event rates and relative risks by age group, pregnancy, and concomitant vaccine status**

| Group                 | Type of Adverse Event <sup>a</sup>         |                         |                                     |                                            |                         |                                     |                                            |                         |                                     |
|-----------------------|--------------------------------------------|-------------------------|-------------------------------------|--------------------------------------------|-------------------------|-------------------------------------|--------------------------------------------|-------------------------|-------------------------------------|
|                       | Any adverse event [n/N (%)]                |                         |                                     | Fever [n/N (%)]                            |                         |                                     | Medical attendance [n/N (%)]               |                         |                                     |
|                       | Influenza vaccine + concomitant vaccine(s) | Influenza vaccine alone | Relative Risk (95% CI) <sup>b</sup> | Influenza vaccine + concomitant vaccine(s) | Influenza vaccine alone | Relative Risk (95% CI) <sup>b</sup> | Influenza vaccine + concomitant vaccine(s) | Influenza vaccine alone | Relative Risk (95% CI) <sup>b</sup> |
| 6 months–4 years      | 189/1,295 (14.6)                           | 333/4,885 (6.8)         | 2.1 (1.8–2.5)                       | 58/1,211 (4.8)                             | 82/4,768 (1.7)          | 2.8 (2.0–3.9)                       | 15/1,295 (1.2)                             | 44/4,885 (0.9)          | 1.3 (0.7–2.3)                       |
| 5–14 years            | 33/295 (11.2)                              | 262/4,120 (6.4)         | 1.8 (1.3–2.5)                       | 9/281 (3.2)                                | 45/3,985 (1.1)          | 2.8 (1.4–5.7)                       | 2/295 (0.7)                                | 19/4,120 (0.5)          | 1.5 (0.3–6.3)                       |
| 15–39 years           | 205/2,612 (7.8)                            | 631/10,822 (5.8)        | 1.4 (1.2–1.6)                       | 27/2,491 (1.1)                             | 94/10,529 (0.9)         | 1.2 (0.8–1.9)                       | 18/2,612 (0.7)                             | 57/10,822 (0.5)         | 1.3 (0.8–2.2)                       |
| 40–64 years           | 138/1,516 (9.1)                            | 1,395/20,193 (6.9)      | 1.3 (1.1–1.6)                       | 27/1,456 (1.9)                             | 163/19,497 (0.8)        | 2.2 (1.5–3.3)                       | 19/1,516 (1.3)                             | 75/20,193 (0.4)         | 3.4 (2.1–5.6)                       |
| ≥65 years             | 568/4,710 (12.1)                           | 1,127/23,444 (4.8)      | 2.5 (2.3–2.8)                       | 89/4,439 (2.0)                             | 120/22,783 (0.5)        | 3.8 (2.9–5.0)                       | 33/4,710 (0.7)                             | 44/23,444 (0.2)         | 3.7 (2.4–5.9)                       |
| Pregnant <sup>c</sup> | 57/634 (9.0)                               | 61/1,384 (4.4)          | 2.0 (1.4–2.9)                       | 7/602 (1.2)                                | 13/1,361 (1.0)          | 1.2 (0.5–3.0)                       | 2/634 (0.3)                                | 8/1,384 (0.6)           | 0.6 (0.1–2.6)                       |
| Total                 | 1,133/10,428 (10.9)                        | 3,748/63,464 (5.9)      | 1.8 (1.7–2.0)                       | 210/9,878 (2.1)                            | 504/61,562 (0.8)        | 2.6 (2.2–3.1)                       | 87/10,428 (0.8)                            | 239/63,464 (0.4)        | 2.2 (1.7–2.8)                       |

<sup>a</sup> Denominators differ between any adverse event/medical attendance and fever because reports of fever are solicited in an online survey following the initial SMS regarding an AEFI, and not all participants complete the survey.

<sup>b</sup> Relative risk of any adverse event, fever, or medical attendance for influenza vaccine administered with any concomitant vaccine(s) as compared to influenza vaccine administered alone.

<sup>c</sup> Pregnant participants are also included in their respective age categories (age range: 15–49 years).

**Table 4. Adverse event rates and relative risks by age group, pregnancy status, and vaccine brand**

| Group                         | Type of Adverse Event <sup>a</sup> |                       |                                              |                     |                      |                                              |                              |                      |                                              |
|-------------------------------|------------------------------------|-----------------------|----------------------------------------------|---------------------|----------------------|----------------------------------------------|------------------------------|----------------------|----------------------------------------------|
|                               | Any adverse event [n/N (%)]        |                       |                                              | Fever [n/n (%)]     |                      |                                              | Medical attendance [n/N (%)] |                      |                                              |
|                               | <i>FluQuadri</i>                   | <i>Fluarix Tetra</i>  | <i>Relative Risk<sup>b</sup></i><br>(95% CI) | <i>FluQuadri</i>    | <i>Fluarix Tetra</i> | <i>Relative Risk<sup>b</sup></i><br>(95% CI) | <i>FluQuadri</i>             | <i>Fluarix Tetra</i> | <i>Relative Risk<sup>b</sup></i><br>(95% CI) |
| <i>3–14 years<sup>c</sup></i> | 317/4,076<br>(7.8)                 | 150/2,203<br>(6.8)    | 1.1<br>(1.0–1.4)                             | 68/3,933<br>(1.7)   | 29/2,133<br>(1.4)    | 1.3<br>(0.8–2.0)                             | 14/4,076<br>(0.3)            | 20/2,203<br>(0.9)    | 0.4<br>(0.2–0.8)                             |
| <i>15–39 years</i>            | 479/7,484<br>(6.4)                 | 295/5,059<br>(5.8)    | 1.1<br>(1.0–1.3)                             | 65/7,254<br>(0.9)   | 46/4,908<br>(0.9)    | 1.0<br>(0.7–1.4)                             | 40/7,484<br>(0.5)            | 33/5,059<br>(0.7)    | 0.8<br>(0.5–1.3)                             |
| <i>40–64 years</i>            | 805/10,620<br>(7.6)                | 607/9,252<br>(6.6)    | 1.16<br>(1.0–1.3)                            | 101/10,237<br>(1.0) | 76/8,938<br>(0.9)    | 1.2<br>(0.9–1.6)                             | 45/10,620<br>(0.4)           | 42/9,252<br>(0.5)    | 0.9<br>(0.6–1.4)                             |
| <i>≥65 years</i>              | 638/8,916<br>(7.2)                 | 912/16,938<br>(5.4)   | 1.3<br>(1.2–1.5)                             | 81/8,587<br>(0.9)   | 117/16,426<br>(0.7)  | 1.3<br>(1.0–1.8)                             | 22/8,916<br>(0.2)            | 43/16,938<br>(0.3)   | 1.0<br>(0.6–1.6)                             |
| <i>Pregnant<sup>d</sup></i>   | 60/963<br>(6.2)                    | 43/901<br>(4.8)       | 1.3<br>(0.9–1.9)                             | 7/932<br>(0.8)      | 10/885<br>(1.1)      | 0.7<br>(0.3–1.7)                             | 4/963<br>(0.4)               | 6/901<br>(0.7)       | 0.6<br>(0.2–2.2)                             |
| <i>Total</i>                  | 2,239/31,096<br>(7.2)              | 1,964/33,452<br>(5.9) | 1.2<br>(1.2–1.3)                             | 317/30,136<br>(1.1) | 268/32,420<br>(0.8)  | 1.3<br>(1.1–1.5)                             | 121/31,096<br>(0.4)          | 138/33,452<br>(0.4)  | 0.9<br>(0.7–1.2)                             |

<sup>a</sup> Denominators differ between any adverse event/medical attendance and fever because reports of fever are solicited in an online survey following the initial SMS regarding an AEFI, and not all participants complete the survey.

<sup>b</sup> Relative risk of any adverse event or medical attendance for FluQuadri compared to Fluarix Tetra.

<sup>c</sup> Fluarix Tetra (GlaxoSmithKline) and FluQuadri (Sanofi-Aventis) are each licensed for use in individuals aged ≥3 years. We excluded n = 15 individuals aged 6 months–2 years who were reported to have received Fluarix Tetra, and n = 129 individuals aged 6 months–2 years who were reported to have received FluQuadri, from this analysis.

<sup>d</sup> Pregnant participants are also included in their respective age categories (age range: 15–49 years).

1  
2  
3  
4  
5  
6  
7  
8  
9  
10  
11  
12  
13  
14  
15  
16  
17  
18  
19  
20  
21  
22  
23  
24  
25  
26  
27  
28  
29  
30  
31  
32  
33  
34  
35  
36  
37  
38  
39  
40  
41  
42  
43  
44  
45  
46  
47  
48  
49  
50  
51  
52  
53  
54  
55  
56  
57  
58  
59  
60

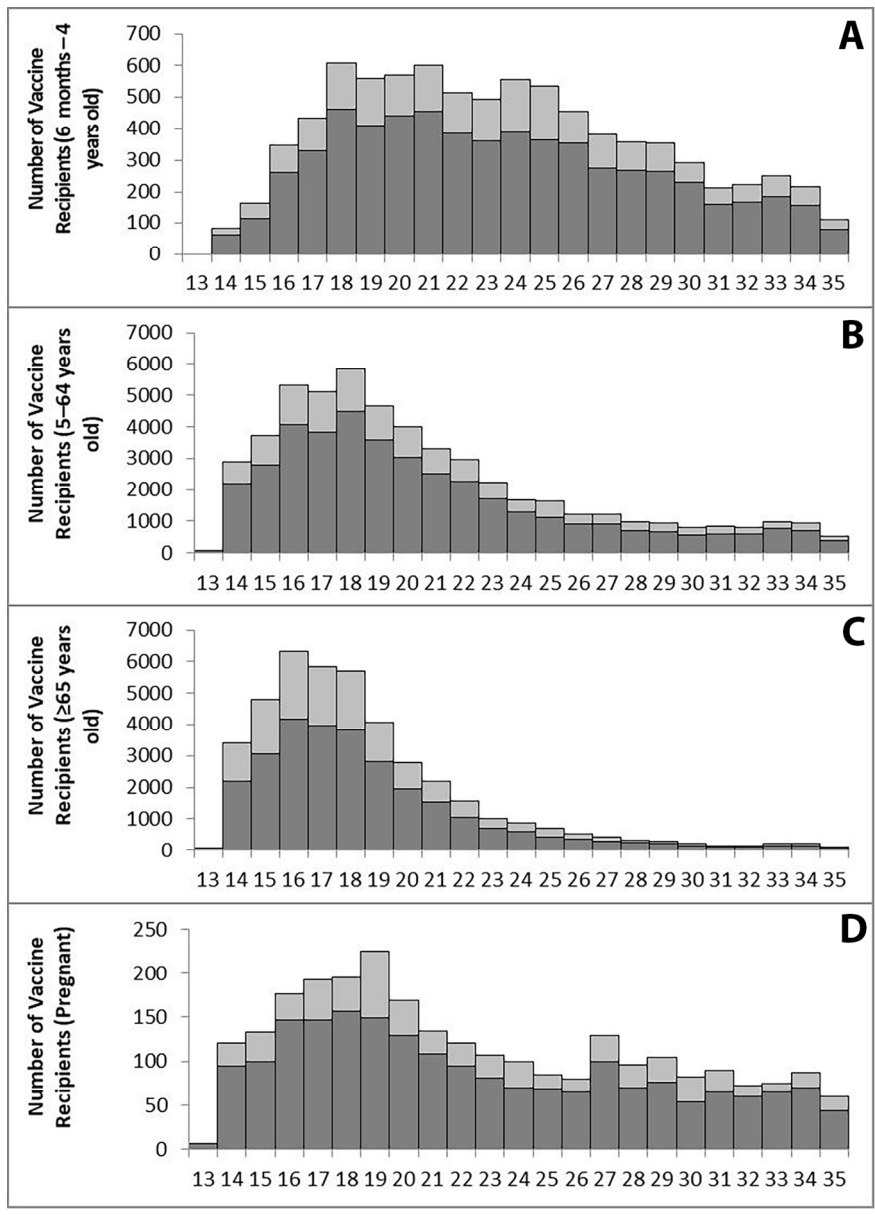

134x185mm (300 x 300 DPI)

**eFigure1. Fast initial response cumulative sum (FIR CUSUM) safety signal detection charts for medical attendance during the surveillance period, by age group and pregnancy status**

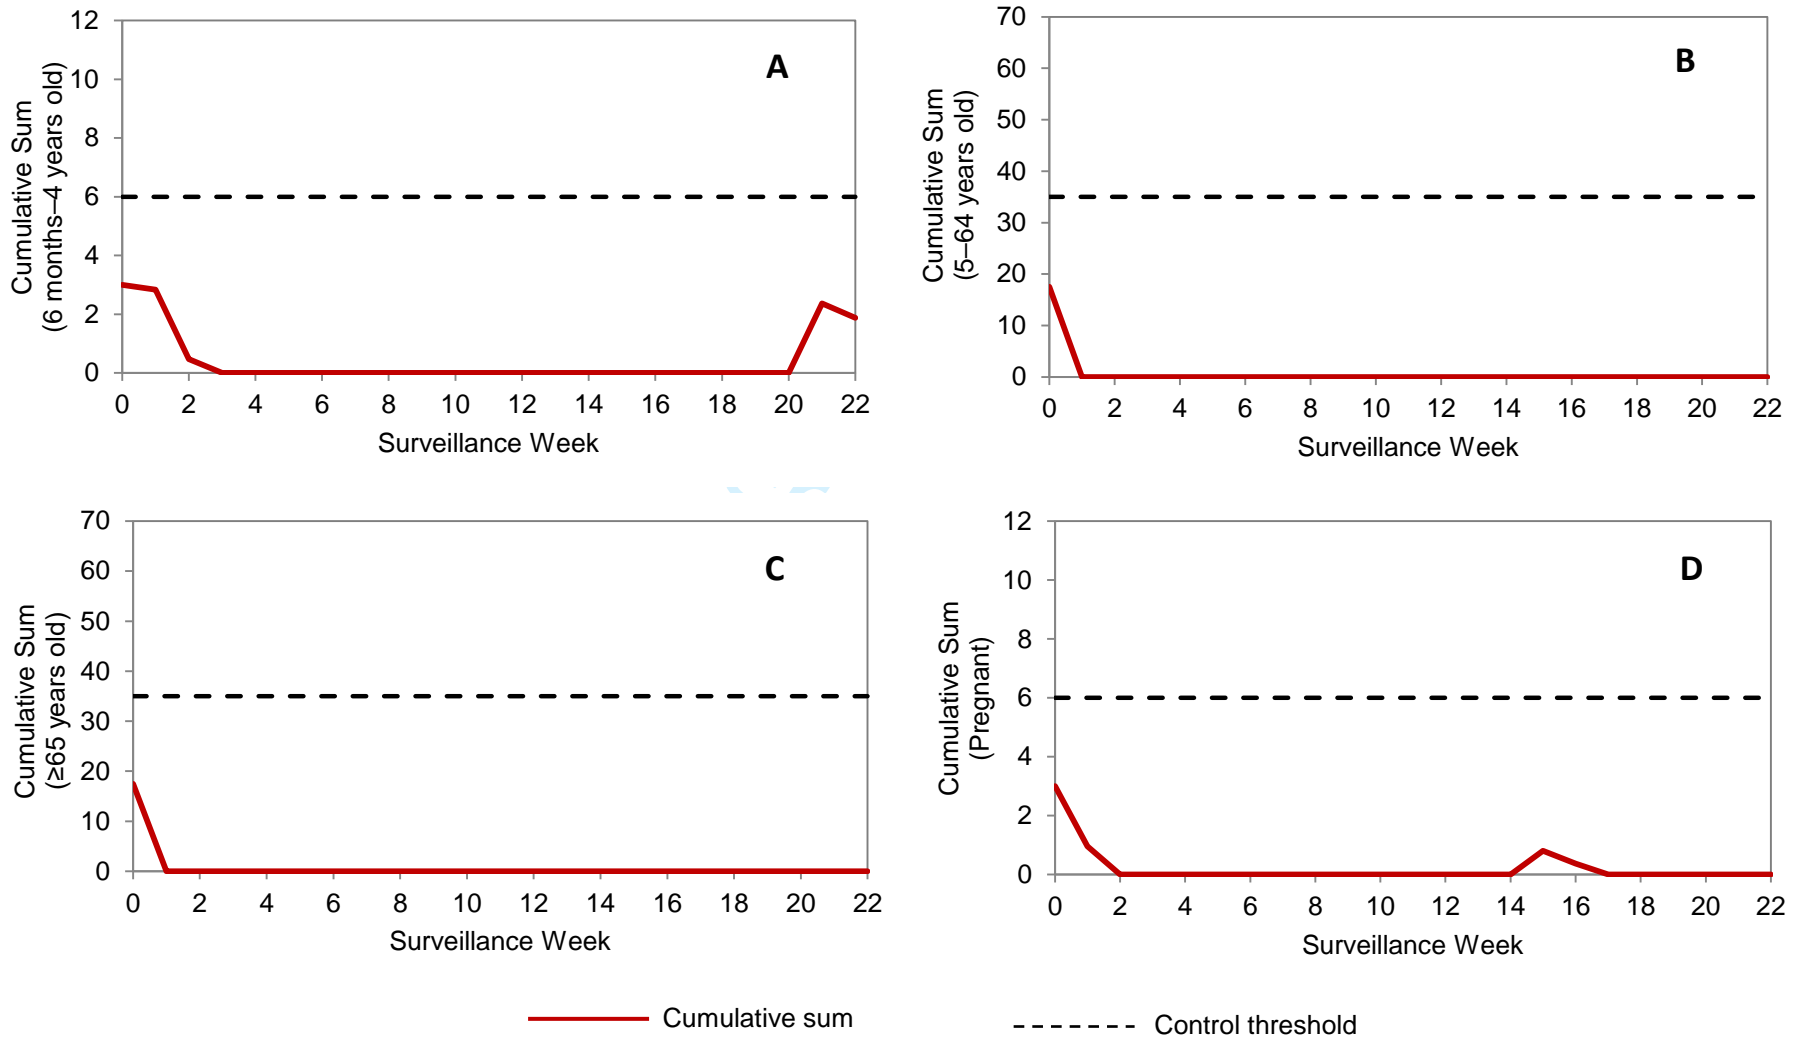

Note: Surveillance week 1 started on 1 April and ended on 9 April, for a total of 9 days. Surveillance week 22 started on 28 August and ended on 31 August, for a total of 4 days.

**eTable 1. Secondary outcome adverse event rates, by age group and pregnancy status**

| Adverse Event <sup>a</sup>                                       | 6 months–4 years   | 5–14 years        | 15–39 years         | 40–64 years         | ≥65 years           | Pregnant <sup>b</sup> | Total                 |
|------------------------------------------------------------------|--------------------|-------------------|---------------------|---------------------|---------------------|-----------------------|-----------------------|
| <i>Pain at the injection site</i>                                | 113/5,979<br>(1.9) | 86/4,266<br>(2.0) | 255/13,020<br>(2.0) | 419/20,953<br>(2.0) | 354/27,222<br>(1.3) | 36/1,963<br>(1.8)     | 1,227/71,440<br>(1.7) |
| <i>Tired/fatigued<sup>c</sup></i>                                | 83/5,571<br>(1.5)  | 52/4,249<br>(1.2) | 183/12,862<br>(1.4) | 368/20,661<br>(1.8) | 331/27,069<br>(1.2) | 22/1,961<br>(1.1)     | 1,017/70,412<br>(1.4) |
| <i>Swelling and/or redness at the injection site<sup>d</sup></i> | 95/5,968<br>(1.6)  | 71/4,255<br>(1.7) | 172/12,875<br>(1.3) | 306/20,692<br>(1.5) | 289/27,127<br>(1.1) | 24/1,963<br>(1.2)     | 933/70,917<br>(1.3)   |
| <i>Headache<sup>c</sup></i>                                      | 7/5,567<br>(0.1)   | 42/4,247<br>(1.0) | 155/12,859<br>(1.2) | 286/20,659<br>(1.4) | 231/27,060<br>(0.9) | 26/1,960<br>(1.3)     | 721/70,392<br>(1.0)   |
| <i>Sleep pattern change<sup>c</sup></i>                          | 55/5,570<br>(1.0)  | 28/4,248<br>(0.7) | 53/12,851<br>(0.4)  | 111/20,648<br>(0.5) | 101/27,029<br>(0.4) | 5/1,960<br>(0.3)      | 348/70,346<br>(0.5)   |
| <i>Irritable<sup>c</sup></i>                                     | 94/5,571<br>(1.7)  | 21/4,245<br>(0.5) | 56/12,855<br>(0.4)  | 77/20,641<br>(0.4)  | 56/27,016<br>(0.2)  | 5/1,961<br>(0.3)      | 304/70,328<br>(0.4)   |
| <i>Rash<sup>e</sup></i>                                          | 31/5,979<br>(0.5)  | 10/4,266<br>(0.2) | 26/13,020<br>(0.2)  | 40/20,953<br>(0.2)  | 70/27,222<br>(0.3)  | 1/1,963<br>(0.1)      | 177/71,440<br>(0.2)   |
| <i>Vomiting<sup>c</sup></i>                                      | 29/5,568<br>(0.5)  | 8/4,246<br>(0.2)  | 33/12,849<br>(0.3)  | 27/20,643<br>(0.1)  | 12/27,011<br>(0.04) | 9/1,960<br>(0.5)      | 109/70,317<br>(0.2)   |
| <i>Diarrhea<sup>c</sup></i>                                      | 15/5,567<br>(0.3)  | 4/4,246<br>(0.1)  | 26/12,851<br>(0.2)  | 41/20,644<br>(0.2)  | 33/27,018<br>(0.1)  | 3/1,960<br>(0.2)      | 119/70,326<br>(0.2)   |
| <i>Rigors<sup>f</sup></i>                                        | 7/5,579<br>(0.1)   | 3/4,257<br>(0.1)  | 15/12,997<br>(0.1)  | 34/20,903<br>(0.2)  | 34/27,113<br>(0.1)  | 2/1,960<br>(0.1)      | 93/70,849<br>(0.1)    |
| <i>Non-responsiveness/loss of consciousness<sup>c</sup></i>      | 0/5,567<br>(0.0)   | 0/4,245<br>(0.0)  | 0/12,848<br>(0.0)   | 1/20,637<br>(0.005) | 2/27,010<br>(0.007) | 0/1,960<br>(0.0)      | 3/70,307<br>(0.004)   |
| <i>Convulsions/seizures<sup>g</sup></i>                          | 0/5,979<br>(0.0)   | 0/4,266<br>(0.0)  | 0/13,020<br>(0.0)   | 0/20,953<br>(0.0)   | 2/27,222<br>(0.007) | 0/1,963<br>(0)        | 2/71,440<br>(0.003)   |
| <i>Other<sup>h</sup></i>                                         | 86/5,979<br>(1.4)  | 28/4,266<br>(0.7) | 88/13,020<br>(0.7)  | 196/20,953<br>(0.9) | 247/27,222<br>(0.9) | 13/1,963<br>(0.7)     | 645/71,440<br>(0.9)   |

<sup>a</sup> Denominators differ between adverse events because symptoms are solicited in an online survey following the initial SMS regarding an AEFI, and not all participants complete the survey.

<sup>b</sup> Pregnant participants are also included in their respective age categories (age range: 15–49 years).

<sup>c</sup> Collected by SmartVax only.

<sup>d</sup> SmartVax and STARSS collect data on injection site swelling and/or redness in one question, while Vaxtracker has separate questions for injection site redness and injection site swelling. The Vaxtracker data for injection site redness and injection site swelling have been combined for this table.

<sup>e</sup> STARSS specifies that the rash is over a large area of the body.

<sup>f</sup> SmartVax includes a description (“shaking or shivering with high temperature”), while STARSS and Vaxtracker do not refer to rigors and instead collect data on “chills and shakes”.

<sup>g</sup> SmartVax collects data on “convulsions/seizures”, while Vaxtracker collects information on “seizures”, and STARSS collects information on “seizures or fits”.

<sup>h</sup> A free-text response box is provided for participants responding that they had an “Other” reaction to describe the event(s).

**eTable 2. Primary and secondary outcome adverse event rates, by vaccine brand<sup>a</sup>**

| Adverse event <sup>b</sup>                                       | Afluria Quad       | Fluarix Tetra         | FluQuadri             | FluQuadri Junior   |
|------------------------------------------------------------------|--------------------|-----------------------|-----------------------|--------------------|
| <i>Any event</i>                                                 | 316/4,857<br>(6.5) | 1,965/33,467<br>(5.9) | 2,250/31,225<br>(7.2) | 336/4,147<br>(8.1) |
| <i>Fever</i>                                                     | 32/4,679<br>(0.7)  | 268/32,420<br>(0.8)   | 317/30,136<br>(1.1)   | 96/4,016<br>(2.4)  |
| <i>Medical attention</i>                                         | 20/4,857<br>(0.4)  | 138/33,467<br>(0.4)   | 121/31,225<br>(0.4)   | 46/4,147<br>(1.1)  |
| <i>Pain at the injection site</i>                                | 70/4,679<br>(1.5)  | 460/32,420<br>(1.4)   | 646/30,136<br>(2.1)   | 48/4,016<br>(1.2)  |
| <i>Tired/fatigued<sup>c</sup></i>                                | 55/4,618<br>(1.2)  | 422/31,974<br>(1.3)   | 488/29,875<br>(1.6)   | 50/3,757<br>(1.3)  |
| <i>Swelling and/or redness at the injection site<sup>d</sup></i> | 59/4,624<br>(1.3)  | 350/32,062<br>(1.1)   | 474/30,030<br>(1.6)   | 47/4,012<br>(1.2)  |
| <i>Headache<sup>c</sup></i>                                      | 50/4,614<br>(1.1)  | 298/31,967<br>(0.9)   | 371/29,868<br>(1.2)   | 2/3,755<br>(0.1)   |
| <i>Sleep pattern change<sup>c</sup></i>                          | 15/4,614<br>(0.3)  | 121/31,938<br>(0.4)   | 171/29,850<br>(0.6)   | 41/3,756<br>(1.1)  |
| <i>Irritable<sup>c</sup></i>                                     | 17/4,613<br>(0.4)  | 91/31,928<br>(0.3)    | 128/29,842<br>(0.4)   | 68/3,757<br>(1.8)  |
| <i>Rash<sup>e</sup></i>                                          | 8/4,679<br>(0.2)   | 58/32,420<br>(0.2)    | 91/30,136<br>(0.3)    | 20/4,016<br>(0.5)  |
| <i>Vomiting<sup>c</sup></i>                                      | 3/4,611<br>(0.1)   | 39/31,924<br>(0.1)    | 48/29,838<br>(0.2)    | 19/3,756<br>(0.5)  |
| <i>Diarrhea<sup>c</sup></i>                                      | 7/4,613<br>(0.2)   | 42/31,931<br>(0.1)    | 57/29,839<br>(0.2)    | 13/3,755<br>(0.3)  |
| <i>Rigors<sup>f</sup></i>                                        | 5/4,667<br>(0.1)   | 39/32,287<br>(0.1)    | 45/29,947<br>(0.2)    | 4/3,760<br>(0.1)   |
| <i>Non-responsiveness/loss of consciousness<sup>c</sup></i>      | 0/4,611<br>(0.0)   | 1/31,920<br>(0.003)   | 2/29,833<br>(0.007)   | 0/3,755<br>(0.0)   |
| <i>Convulsions/seizures<sup>g</sup></i>                          | 0/4,679<br>(0.0)   | 1/32,420<br>(0.003)   | 1/30,136<br>(0.003)   | 0/4,016<br>(0.0)   |
| <i>Other<sup>h</sup></i>                                         | 40/4,679<br>(0.9)  | 255/32,420<br>(0.8)   | 286/30,136<br>(0.9)   | 61/4,016<br>(1.5)  |

Median age for each brand (interquartile range): Afluria Quad: 63 years (47–71 years), Fluarix Tetra: 65 years (45–71 years), FluQuadri: 51 years (29–66 years), FluQuadri Junior: 1 year (1–2 years)

<sup>a</sup> Vaccine brand could not be determined for 196 participants (0.3%), who were excluded from this analysis.

<sup>b</sup> Denominators differ between adverse events because symptoms are solicited in an online survey following the initial SMS regarding an AEFI, and not all participants complete the survey.

<sup>c</sup> Collected by SmartVax only.

<sup>d</sup> SmartVax and STARSS collect data on injection site swelling and/or redness in one question, while Vaxtracker has separate questions for injection site redness and injection site swelling. The Vaxtracker data for injection site redness and injection site swelling have been combined for this table.

<sup>e</sup> STARSS specifies that the rash is over a large area of the body.

<sup>f</sup> SmartVax includes a description ("shaking or shivering with high temperature"), while STARSS and Vaxtracker do not refer to rigors and instead collect data on "chills and shakes".

<sup>g</sup> SmartVax collects data on "convulsions/seizures", while Vaxtracker collects information on "seizures", and STARSS collects information on "seizures or fits".

<sup>h</sup> A free-text response box is provided for participants responding that they had an "Other" reaction to describe the event(s).



**STROBE 2007 (v4) Statement—Checklist of items that should be included in reports of *cohort studies***

| Section/Topic            | Item # | Recommendation                                                                                                                                                                       | Reported on page # |
|--------------------------|--------|--------------------------------------------------------------------------------------------------------------------------------------------------------------------------------------|--------------------|
| Title and abstract       | 1      | (a) Indicate the study's design with a commonly used term in the title or the abstract                                                                                               | 1                  |
|                          |        | (b) Provide in the abstract an informative and balanced summary of what was done and what was found                                                                                  | 4-5                |
| <b>Introduction</b>      |        |                                                                                                                                                                                      |                    |
| Background/rationale     | 2      | Explain the scientific background and rationale for the investigation being reported                                                                                                 | 6-7                |
| Objectives               | 3      | State specific objectives, including any prespecified hypotheses                                                                                                                     | 7                  |
| <b>Methods</b>           |        |                                                                                                                                                                                      |                    |
| Study design             | 4      | Present key elements of study design early in the paper                                                                                                                              | 7-11               |
| Setting                  | 5      | Describe the setting, locations, and relevant dates, including periods of recruitment, exposure, follow-up, and data collection                                                      | 7-8                |
| Participants             | 6      | (a) Give the eligibility criteria, and the sources and methods of selection of participants. Describe methods of follow-up                                                           | 7-8                |
|                          |        | (b) For matched studies, give matching criteria and number of exposed and unexposed                                                                                                  | N/A                |
| Variables                | 7      | Clearly define all outcomes, exposures, predictors, potential confounders, and effect modifiers. Give diagnostic criteria, if applicable                                             | 8                  |
| Data sources/measurement | 8*     | For each variable of interest, give sources of data and details of methods of assessment (measurement). Describe comparability of assessment methods if there is more than one group | 7-10               |
| Bias                     | 9      | Describe any efforts to address potential sources of bias                                                                                                                            | None               |
| Study size               | 10     | Explain how the study size was arrived at                                                                                                                                            | N/A                |
| Quantitative variables   | 11     | Explain how quantitative variables were handled in the analyses. If applicable, describe which groupings were chosen and why                                                         | 9-11               |
| Statistical methods      | 12     | (a) Describe all statistical methods, including those used to control for confounding                                                                                                | 10-11              |
|                          |        | (b) Describe any methods used to examine subgroups and interactions                                                                                                                  | 10-11              |
|                          |        | (c) Explain how missing data were addressed                                                                                                                                          | N/A                |
|                          |        | (d) If applicable, explain how loss to follow-up was addressed                                                                                                                       | N/A                |
|                          |        | (e) Describe any sensitivity analyses                                                                                                                                                | N/A                |
| <b>Results</b>           |        |                                                                                                                                                                                      |                    |

|                          |     |                                                                                                                                                                                                              |              |
|--------------------------|-----|--------------------------------------------------------------------------------------------------------------------------------------------------------------------------------------------------------------|--------------|
| Participants             | 13* | (a) Report numbers of individuals at each stage of study—eg numbers potentially eligible, examined for eligibility, confirmed eligible, included in the study, completing follow-up, and analysed            | 11-12        |
|                          |     | (b) Give reasons for non-participation at each stage                                                                                                                                                         | N/A          |
|                          |     | (c) Consider use of a flow diagram                                                                                                                                                                           | -            |
| Descriptive data         | 14* | (a) Give characteristics of study participants (eg demographic, clinical, social) and information on exposures and potential confounders                                                                     | 11-12; 21-22 |
|                          |     | (b) Indicate number of participants with missing data for each variable of interest                                                                                                                          | 21-22        |
|                          |     | (c) Summarise follow-up time (eg, average and total amount)                                                                                                                                                  | -            |
| Outcome data             | 15* | Report numbers of outcome events or summary measures over time                                                                                                                                               | 11-12; 23-25 |
| Main results             | 16  | (a) Give unadjusted estimates and, if applicable, confounder-adjusted estimates and their precision (eg, 95% confidence interval). Make clear which confounders were adjusted for and why they were included | 21-25        |
|                          |     | (b) Report category boundaries when continuous variables were categorized                                                                                                                                    | -            |
|                          |     | (c) If relevant, consider translating estimates of relative risk into absolute risk for a meaningful time period                                                                                             | -            |
| Other analyses           | 17  | Report other analyses done—eg analyses of subgroups and interactions, and sensitivity analyses                                                                                                               | 11-12; 23-25 |
| <b>Discussion</b>        |     |                                                                                                                                                                                                              |              |
| Key results              | 18  | Summarise key results with reference to study objectives                                                                                                                                                     | 12-15        |
| <b>Limitations</b>       |     |                                                                                                                                                                                                              |              |
| Interpretation           | 20  | Give a cautious overall interpretation of results considering objectives, limitations, multiplicity of analyses, results from similar studies, and other relevant evidence                                   | 12-15        |
| Generalisability         | 21  | Discuss the generalisability (external validity) of the study results                                                                                                                                        | 13-15        |
| <b>Other information</b> |     |                                                                                                                                                                                                              |              |
| Funding                  | 22  | Give the source of funding and the role of the funders for the present study and, if applicable, for the original study on which the present article is based                                                | 5            |

\*Give information separately for cases and controls in case-control studies and, if applicable, for exposed and unexposed groups in cohort and cross-sectional studies.

**Note:** An Explanation and Elaboration article discusses each checklist item and gives methodological background and published examples of transparent reporting. The STROBE checklist is best used in conjunction with this article (freely available on the Web sites of PLoS Medicine at <http://www.plosmedicine.org/>, Annals of Internal Medicine at <http://www.annals.org/>, and Epidemiology at <http://www.epidem.com/>). Information on the STROBE Initiative is available at [www.strobe-statement.org](http://www.strobe-statement.org).
