# Supplementary material for: Active surveillance of 2017 seasonal influenza vaccine safety: an observational cohort study of individuals aged 6 months and older in Australia
Source: PubMed Central journal article supplement — BMJ Open. 2018 Oct 18;8(10):e023263. doi: 10.1136/bmjopen-2018-023263 (PMC6196842; doi:10.1136/bmjopen-2018-023263), 2018-10-18
Supplement: bmjopen-2018-023263supp001.pdf [file bmjopen-2018-023263supp001.pdf]

**eFigure1. Fast initial response cumulative sum (FIR CUSUM) safety signal detection charts for medical attendance during the surveillance period, by age group and pregnancy status**

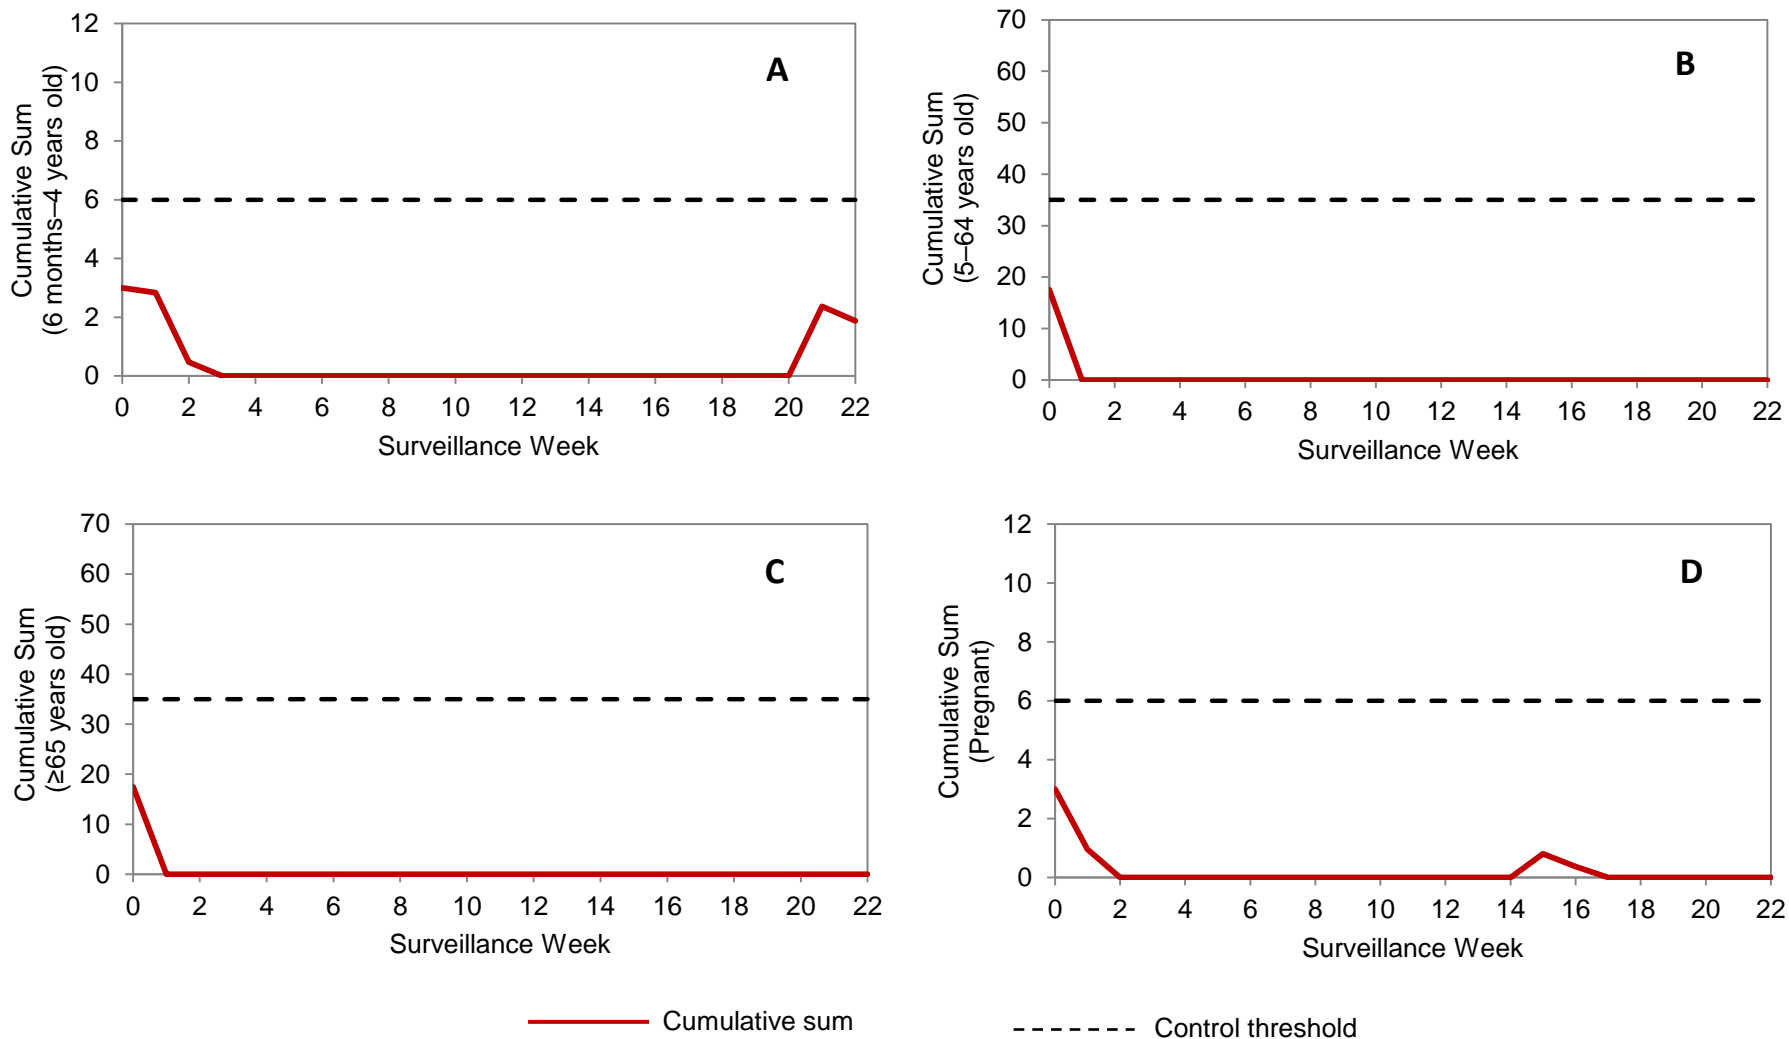

Note: Surveillance week 1 started on 1 April and ended on 9 April, for a total of 9 days. Surveillance week 22 started on 28 August and ended on 31 August, for a total of 4 days.
